# Supplementary material for: Patients with coronary heart disease, dilated cardiomyopathy and idiopathic ventricular tachycardia share overlapping patterns of pathogenic variation in cardiac risk genes
Source: PubMed Central journal article supplement (PMC7821765; doi:10.7717/peerj.10711), 2021-01-19
Supplement: peerj-09-10711-s003.pdf [file peerj-09-10711-s003.pdf]

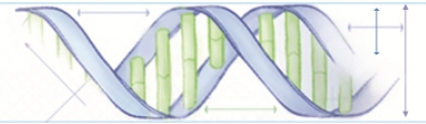

## General Information

User: slave.trajanoski@medunigraz.at  
Workgroup: ZMF  
Folder: ZMF

File Type: HaloPlex Design Report  
Created By: HaloPlex Advanced Design Wizard  
Timestamp: 16-Dec-2013

## Design Information

Design Name: ZMF96cardio  
Design ID: 22408-1387190209  
Species: H. sapiens (H. sapiens, hg19, GRCh37, February 2009)  
Platform: Illumina  
Read Length: 150 bp

### Probegroup Summary

Number of Probegroups: 2  
Probegroup 1 : CP\_241012\_opt  
Probegroup 2 : ZMF96cardio\_1

### Target Summary

Target Region Size : 463.767 kbp

### Amplicon Summary

Total Amplicons: 19958  
Total Target Bases Analyzable: 406.062 kbp  
Total Sequenceable Design Size: 1.039 Mbp  
Target Coverage: 99.46 %  
Recommended Minimum Sequencing per Sample: 207.994 Mbp  
Pricing: Illumina Tier 1 (Probe Region Size = 0 - 499 kbp; up to 20K probes)  
:

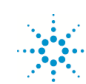

## Design Details

| Target ID              | Regions | Coverage | High Coverage<br>( $\geq 90\%$ ) | Low Coverage<br>( $< 90\%$ ) |
|------------------------|---------|----------|----------------------------------|------------------------------|
| ABCC9                  | 41      | 100 %    | 41                               | 0                            |
| ACTC1                  | 6       | 96.97 %  | 5                                | 1                            |
| ACTN2                  | 23      | 99.82 %  | 23                               | 0                            |
| AKAP9                  | 52      | 99.72 %  | 52                               | 0                            |
| ANK2                   | 58      | 99.93 %  | 58                               | 0                            |
| ANKRD1                 | 9       | 100 %    | 9                                | 0                            |
| ATP2A2                 | 22      | 100 %    | 22                               | 0                            |
| BAG3                   | 5       | 100 %    | 5                                | 0                            |
| CACNA1C                | 53      | 99.95 %  | 53                               | 0                            |
| CACNA2D1               | 42      | 100 %    | 42                               | 0                            |
| CACNB2                 | 20      | 99.78 %  | 20                               | 0                            |
| CALR3                  | 9       | 100 %    | 9                                | 0                            |
| CASQ2                  | 11      | 100 %    | 11                               | 0                            |
| CAV3                   | 2       | 100 %    | 2                                | 0                            |
| chr3:52485107-52488057 | 1       | 100 %    | 1                                | 0                            |
| chr6:7541909-7542329   | 1       | 100 %    | 1                                | 0                            |
| chr6:7555939-7556069   | 1       | 100 %    | 1                                | 0                            |
| chr6:7558339-7558509   | 1       | 100 %    | 1                                | 0                            |
| chr6:7559459-7559649   | 1       | 100 %    | 1                                | 0                            |
| chr6:7562869-7563029   | 1       | 100 %    | 1                                | 0                            |
| chr6:7563959-7564029   | 1       | 100 %    | 1                                | 0                            |
| chr6:7565579-7565769   | 1       | 100 %    | 1                                | 0                            |
| chr6:7566609-7566729   | 1       | 100 %    | 1                                | 0                            |
| chr6:7567569-7567699   | 1       | 100 %    | 1                                | 0                            |
| chr6:7568009-7568149   | 1       | 100 %    | 1                                | 0                            |
| chr6:7568659-7568839   | 1       | 100 %    | 1                                | 0                            |
| chr6:7569409-7569599   | 1       | 100 %    | 1                                | 0                            |
| chr6:7570659-7570809   | 1       | 100 %    | 1                                | 0                            |
| chr6:7571609-7571829   | 1       | 100 %    | 1                                | 0                            |
| chr6:7572060-7572310   | 1       | 100 %    | 1                                | 0                            |
| chr6:7574308-7574499   | 1       | 100 %    | 1                                | 0                            |
| chr6:7574879-7575039   | 1       | 100 %    | 1                                | 0                            |

| Target ID                | Regions | Coverage | High Coverage<br>( ≥ 90%) | Low Coverage<br>( < 90%) |
|--------------------------|---------|----------|---------------------------|--------------------------|
| chr6:7575509-7575732     | 1       | 100 %    | 1                         | 0                        |
| chr6:7576507-7576709     | 1       | 100 %    | 1                         | 0                        |
| chr6:7577179-7577289     | 1       | 100 %    | 1                         | 0                        |
| chr6:7578009-7578129     | 1       | 100 %    | 1                         | 0                        |
| chr6:7578679-7578809     | 1       | 100 %    | 1                         | 0                        |
| chr6:7579499-7581819     | 1       | 100 %    | 1                         | 0                        |
| chr6:7582859-7586129     | 1       | 100 %    | 1                         | 0                        |
| CHRM2                    | 1       | 100 %    | 1                         | 0                        |
| chrX:100645867-100646047 | 1       | 100 %    | 1                         | 0                        |
| chrX:100646417-100646567 | 1       | 100 %    | 1                         | 0                        |
| chrX:100646727-100646820 | 1       | 100 %    | 1                         | 0                        |
| chrX:100650317-100650457 | 1       | 100 %    | 1                         | 0                        |
| chrX:100666857-100669138 | 1       | 100 %    | 1                         | 0                        |
| chrX:135229548-135229808 | 1       | 100 %    | 1                         | 0                        |
| chrX:135252055-135252147 | 1       | 100 %    | 1                         | 0                        |
| chrX:135288553-135288758 | 1       | 100 %    | 1                         | 0                        |
| chrX:135289161-135289359 | 1       | 100 %    | 1                         | 0                        |
| chrX:135289945-135290135 | 1       | 100 %    | 1                         | 0                        |
| chrX:135292018-135293528 | 1       | 100 %    | 1                         | 0                        |
| chrX:153639866-153640316 | 1       | 100 %    | 1                         | 0                        |
| chrX:153640413-153640566 | 1       | 100 %    | 1                         | 0                        |
| chrX:153641526-153641606 | 1       | 100 %    | 1                         | 0                        |
| chrX:153641806-153641916 | 1       | 100 %    | 1                         | 0                        |
| chrX:153647866-153647976 | 1       | 100 %    | 1                         | 0                        |
| chrX:153648360-153648446 | 1       | 100 %    | 1                         | 0                        |
| chrX:153648536-153648616 | 1       | 100 %    | 1                         | 0                        |
| chrX:153648986-153649086 | 1       | 100 %    | 1                         | 0                        |
| chrX:153649226-153650076 | 1       | 100 %    | 1                         | 0                        |
| CRYAB                    | 3       | 100 %    | 3                         | 0                        |
| CSRP3                    | 5       | 99.85 %  | 5                         | 0                        |
| CTF1                     | 3       | 100 %    | 3                         | 0                        |
| DES                      | 9       | 100 %    | 9                         | 0                        |
| DMD                      | 88      | 99.92 %  | 88                        | 0                        |
| DSC2                     | 35      | 99.82 %  | 35                        | 0                        |

| Target ID | Regions | Coverage | High Coverage<br>( $\geq 90\%$ ) | Low Coverage<br>( $< 90\%$ ) |
|-----------|---------|----------|----------------------------------|------------------------------|
| DSG2      | 15      | 100 %    | 15                               | 0                            |
| DTNA      | 27      | 99.68 %  | 26                               | 1                            |
| EMD       | 6       | 100 %    | 6                                | 0                            |
| EYA4      | 21      | 100 %    | 21                               | 0                            |
| FHL2      | 8       | 100 %    | 8                                | 0                            |
| FKTN      | 12      | 99.68 %  | 12                               | 0                            |
| GAA       | 19      | 100 %    | 19                               | 0                            |
| GJA5      | 1       | 100 %    | 1                                | 0                            |
| GPD1L     | 8       | 99.18 %  | 8                                | 0                            |
| HCN4      | 8       | 100 %    | 8                                | 0                            |
| ILK       | 12      | 100 %    | 12                               | 0                            |
| JPH2      | 6       | 100 %    | 6                                | 0                            |
| JUP       | 20      | 100 %    | 20                               | 0                            |
| KCNA5     | 1       | 100 %    | 1                                | 0                            |
| KCND3     | 7       | 100 %    | 7                                | 0                            |
| KCNE1     | 1       | 100 %    | 1                                | 0                            |
| KCNE2     | 1       | 100 %    | 1                                | 0                            |
| KCNE3     | 1       | 100 %    | 1                                | 0                            |
| KCNE5     | 1       | 100 %    | 1                                | 0                            |
| KCNH2     | 16      | 100 %    | 16                               | 0                            |
| KCNJ2     | 1       | 99.39 %  | 1                                | 0                            |
| KCNJ5     | 2       | 100 %    | 2                                | 0                            |
| KCNJ8     | 2       | 99.24 %  | 2                                | 0                            |
| KCNQ1     | 18      | 100 %    | 18                               | 0                            |
| LAMA2     | 67      | 99.97 %  | 67                               | 0                            |
| LAMA4     | 44      | 100 %    | 44                               | 0                            |
| LAMP2     | 11      | 99.42 %  | 11                               | 0                            |
| LDB3      | 16      | 100 %    | 16                               | 0                            |
| LMNA      | 17      | 99.71 %  | 16                               | 1                            |
| MOG1      | 4       | 100 %    | 4                                | 0                            |
| MYBPC3    | 34      | 100 %    | 34                               | 0                            |
| MYH6      | 37      | 97.94 %  | 35                               | 2                            |
| MYH7      | 38      | 99 %     | 37                               | 1                            |
| MYL2      | 7       | 88.61 %  | 6                                | 1                            |

| Target ID | Regions | Coverage | High Coverage<br>( ≥ 90%) | Low Coverage<br>( < 90%) |
|-----------|---------|----------|---------------------------|--------------------------|
| MYL3      | 6       | 100 %    | 6                         | 0                        |
| MYLK2     | 12      | 100 %    | 12                        | 0                        |
| MYO6      | 35      | 99.83 %  | 35                        | 0                        |
| MYOZ2     | 5       | 100 %    | 5                         | 0                        |
| MYPN      | 22      | 100 %    | 22                        | 0                        |
| NDUFV2    | 10      | 100 %    | 10                        | 0                        |
| NEBL      | 34      | 100 %    | 34                        | 0                        |
| NEXN      | 14      | 100 %    | 14                        | 0                        |
| NKX2-5    | 5       | 100 %    | 5                         | 0                        |
| NPPA      | 3       | 100 %    | 3                         | 0                        |
| NUP155    | 35      | 100 %    | 35                        | 0                        |
| PKP2      | 14      | 100 %    | 14                        | 0                        |
| PLN       | 1       | 100 %    | 1                         | 0                        |
| PRKAG2    | 19      | 99.87 %  | 19                        | 0                        |
| PSEN1     | 11      | 99.44 %  | 11                        | 0                        |
| PSEN2     | 11      | 100 %    | 11                        | 0                        |
| RBM20     | 15      | 99.8 %   | 15                        | 0                        |
| RYR2      | 111     | 99.7 %   | 110                       | 1                        |
| SCN1B     | 5       | 99.64 %  | 5                         | 0                        |
| SCN3B     | 5       | 100 %    | 5                         | 0                        |
| SCN4B     | 5       | 100 %    | 5                         | 0                        |
| SCN5A     | 28      | 99.58 %  | 28                        | 0                        |
| SGCB      | 7       | 100 %    | 7                         | 0                        |
| SGCD      | 9       | 100 %    | 9                         | 0                        |
| SNTA1     | 8       | 100 %    | 8                         | 0                        |
| TBX20     | 8       | 99.8 %   | 8                         | 0                        |
| TBX5      | 8       | 100 %    | 8                         | 0                        |
| TCAP      | 2       | 100 %    | 2                         | 0                        |
| TGFB3     | 7       | 100 %    | 7                         | 0                        |
| TMEM43    | 13      | 100 %    | 13                        | 0                        |
| TMPO      | 10      | 100 %    | 10                        | 0                        |
| TNNI3     | 8       | 100 %    | 8                         | 0                        |
| TNNT2     | 21      | 98.44 %  | 20                        | 1                        |
| TPM1      | 16      | 99.62 %  | 16                        | 0                        |

| Target ID | Regions | Coverage | High Coverage<br>( ≥ 90%) | Low Coverage<br>( < 90%) |
|-----------|---------|----------|---------------------------|--------------------------|
| TTN       | 364     | 98.7 %   | 343                       | 21                       |
| TTR       | 7       | 100 %    | 7                         | 0                        |
| VCL       | 22      | 100 %    | 22                        | 0                        |
| chr2      | 1       | 74.5 %   | 0                         | 1                        |
| chr18     | 1       | 36.42 %  | 0                         | 1                        |
| chr19     | 1       | 58.16 %  | 0                         | 1                        |
| chr2      | 1       | 59.14 %  | 0                         | 1                        |
| chr2      | 1       | 42.68 %  | 0                         | 1                        |
| chr2      | 1       | 61.18 %  | 0                         | 1                        |
| chr2      | 1       | 98.82 %  | 1                         | 0                        |
| chr18     | 1       | 48.39 %  | 0                         | 1                        |
| chr2      | 1       | 99.79 %  | 1                         | 0                        |
| chr4      | 1       | 64.73 %  | 0                         | 1                        |
| chr2      | 1       | 54.35 %  | 0                         | 1                        |
| chr1      | 1       | 94.68 %  | 1                         | 0                        |
| chr2      | 1       | 85.67 %  | 0                         | 1                        |
| chr1      | 1       | 85.71 %  | 0                         | 1                        |
| chr2      | 1       | 34.63 %  | 0                         | 1                        |
| chr2      | 1       | 81.47 %  | 0                         | 1                        |
| chr2      | 1       | 53.36 %  | 0                         | 1                        |
| chr2      | 1       | 36.16 %  | 0                         | 1                        |
| chr2      | 1       | 100 %    | 1                         | 0                        |
| chr18     | 1       | 65.24 %  | 0                         | 1                        |
| chr2      | 1       | 100 %    | 1                         | 0                        |
| chr2      | 1       | 67.11 %  | 0                         | 1                        |
| chr18     | 1       | 89.4 %   | 0                         | 1                        |
| chr2      | 1       | 65.81 %  | 0                         | 1                        |
| chr4      | 1       | 98.84 %  | 1                         | 0                        |
| chr2      | 1       | 97.79 %  | 1                         | 0                        |
| chr2      | 1       | 52.69 %  | 0                         | 1                        |
| chr2      | 1       | 74.53 %  | 0                         | 1                        |
| chr12     | 1       | 95.38 %  | 1                         | 0                        |
| chr3      | 1       | 99.12 %  | 1                         | 0                        |
| chr2      | 1       | 89.24 %  | 0                         | 1                        |

| Target ID | Regions | Coverage | High Coverage (>= 90%) | Low Coverage (< 90%) |
|-----------|---------|----------|------------------------|----------------------|
| chr2      | 1       | 50.54 %  | 0                      | 1                    |
| chr2      | 1       | 100 %    | 1                      | 0                    |
| chr2      | 1       | 79.29 %  | 0                      | 1                    |
| chr1      | 1       | 79.69 %  | 0                      | 1                    |
| chr2      | 1       | 80.43 %  | 0                      | 1                    |
| chr7      | 1       | 85.49 %  | 0                      | 1                    |
| chr3      | 1       | 95.14 %  | 1                      | 0                    |
| chr2      | 1       | 69.37 %  | 0                      | 1                    |
| chr2      | 1       | 84.11 %  | 0                      | 1                    |
| chr2      | 1       | 81.14 %  | 0                      | 1                    |
| chr2      | 1       | 78.37 %  | 0                      | 1                    |
| chr2      | 1       | 89.56 %  | 0                      | 1                    |
| chr18     | 1       | 60.32 %  | 0                      | 1                    |
| chr1      | 1       | 77.38 %  | 0                      | 1                    |
| chr2      | 1       | 73.04 %  | 0                      | 1                    |
| chr1      | 1       | 58.68 %  | 0                      | 1                    |
| chr7      | 1       | 96.11 %  | 1                      | 0                    |
| chr18     | 1       | 95.02 %  | 1                      | 0                    |
| chr2      | 1       | 98.67 %  | 1                      | 0                    |
| chr10     | 1       | 81.14 %  | 0                      | 1                    |
| chr15     | 1       | 41.85 %  | 0                      | 1                    |
| chr2      | 1       | 96.02 %  | 1                      | 0                    |
| chr2      | 1       | 99.26 %  | 1                      | 0                    |
| chr18     | 1       | 93.33 %  | 1                      | 0                    |
| chr2      | 1       | 55.98 %  | 0                      | 1                    |
| chr17     | 1       | 43.75 %  | 0                      | 1                    |
| chr2      | 1       | 65.15 %  | 0                      | 1                    |
| chr1      | 1       | 93.08 %  | 1                      | 0                    |
| chr2      | 1       | 65.51 %  | 0                      | 1                    |
