# Supplementary material for: Patients with coronary heart disease, dilated cardiomyopathy and idiopathic ventricular tachycardia share overlapping patterns of pathogenic variation in cardiac risk genes
Source: PubMed Central journal article supplement (PMC7821765; doi:10.7717/peerj.10711), 2021-01-19
Supplement: peerj-09-10711-s013.pdf [file peerj-09-10711-s013.pdf]

**Supplemental file 13.**

**Figure S5. Sanger sequencing showing gene mutations observed in the present study in patients with VT.** Mutation sites are indicated by arrows. Pathogenicity class (ACMG) and #cases - carriers of mutations also shown.

640  
T G G C C A C A T

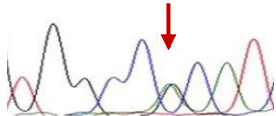

MYBPC3, R160W  
c.478C>T, p. Arg160Trp

VUS  
iVT #233

340  
C T A C G G C A

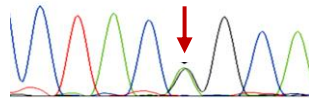

MYBPC3, R326Q  
c.977G>A, p.Arg326Gln

Benign  
CHM VT #226, #391  
DCM VT #210, #278

420  
C T T T C C A G

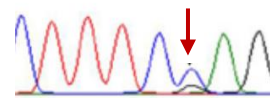

MYBPC3, Q998E  
c.2992C>G, p.Gln998Glu

VUS  
DCM VT #410, #480  
iVT #291

C T T C G G A A

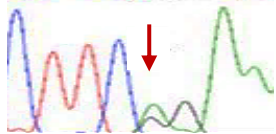

KCNJ2, R218Q  
c.653G>A, p.Arg218Gln

Pathogenic  
iVT #511

110  
T G T G G G G G

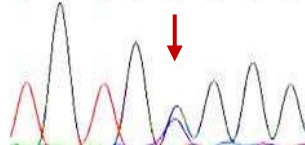

GAA, W746C  
c.2238G>C, p.Trp746Cys

Pathogenic  
CHD VT #533

300  
C C G C T T

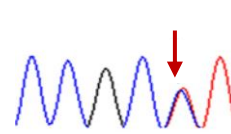

MYH7, F244L  
c.730T>C, p.Phe244Leu

Pathogenic  
DCM VT #574

460  
C C C C A G C T C

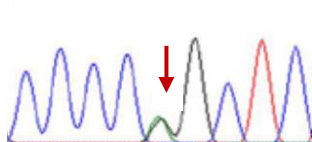

PRKAG2, G100S  
c.298G>A, p.Gly100Ser

Benign  
CHD VT #344, #436, #412  
DCM VT #199  
iVT #490

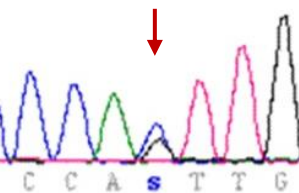

RYR2, V1810L\*  
c.5428G>C, p.Val1810Leu

Benign  
iVT #271

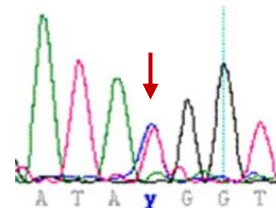

RYR2, T2504M\*  
c.7511C>T, p.Thr2504Met

Benign  
iVT #444

\* Akilzhanova A, Guelly C, Nuralinov O, et al. RYR2 sequencing reveals novel missense mutations in a Kazakh idiopathic ventricular tachycardia study cohort. *PLoS One*. 2014;9(6):e101059. Published 2014 Jun 30. doi:10.1371/journal.pone.0101059

**Table S7. Sequences of primers used for validation of selected genetic variants.**

| Gene symbol | Protein/nucleotide change             | Exon |            | Primer (5' to 3')                              | PCR fragment (bp) |
|-------------|---------------------------------------|------|------------|------------------------------------------------|-------------------|
| MYBPC3      | R160W<br>c.478C>T,<br>p. Arg160Trp    | 1    | Sense:     | GCTCCTCTGCTCCCTAC<br>TTCC                      | 708               |
|             |                                       |      | Antisense: | ATGGCCATCAGCACAC<br>TTCAC                      |                   |
| MYBPC3      | R326Q,<br>c.977G>A,<br>p.Arg326Gln    | 12   | Sense:     | GGCGGCACAGAGGGGA<br>TTG                        | 680               |
|             |                                       |      | Antisense: | ACCGGCAGGAGCAAAA<br>GGATG                      |                   |
| MYBPC3      | Q998E,<br>c.2992C>G,<br>p.Gln998Glu   | 27   | Sense:     | TATGTGACCAGTGGGC<br>AGTTC                      | 1,093             |
|             |                                       |      | Antisense: | GGGTCTTGTGACTGCA<br>CAAAG                      |                   |
| KCNJ2       | R218Q,<br>c.653G>A,<br>p.Arg218Gln    | 2    | Sense:     | GGCGAGTGGGCAATCT<br>TCG                        | 470               |
|             |                                       |      | Antisense: | CTCAAATCATATAAAG<br>GACTGTC                    |                   |
| GAA         | W746C,<br>c.2238G>C,p.Tr<br>p746Cys   | 16   | Sense:     | CGTTCAACAAGGATGG<br>CTTC                       | 381               |
|             |                                       |      | Antisense: | GTGGGTTCTCCAGCTCA<br>TTG                       |                   |
| MYH7        | F244L,<br>c.730T>C,<br>p.Phe244Leu    | 8    | Sense:     | CTTGCTGGTCTCCAGTA<br>GTATTGT                   | 536               |
|             |                                       |      | Antisense: | GGCTGAGCCTAGCAGA<br>TTCAT                      |                   |
| PRKAG2      | G100S,<br>c.298G>A,<br>p.Gly100Ser    | 3    | Sense:     | CAGTCCTGTGTGGTCA<br>GAACTTGG                   | 907               |
|             |                                       |      | Antisense: | GGACCAGAAGGATTAC<br>GCTTTGAT                   |                   |
| RYR2        | V1810L,<br>c.5428G>C,<br>p.Val1810Leu | 37   | Sense:     | TGCGTGCTGGCTACTAT<br>GAC                       | 410               |
|             |                                       |      | Antisense: | CCATTACACAGGAATG<br>CAAAGA                     |                   |
| RYR2        | T2504M*<br>c.7511C>T,<br>p.Thr2504Met | 49   | Sense:     | GTAACGACGGCCAG<br>TGGCCATTGACACCAA<br>AATTCA   | 320               |
|             |                                       |      | Antisense: | GAAACAGCTATGACCA<br>TGACCCATGGCTTACCT<br>GAAAA |                   |
