# Supplementary material for: Patients with coronary heart disease, dilated cardiomyopathy and idiopathic ventricular tachycardia share overlapping patterns of pathogenic variation in cardiac risk genes
Source: PeerJ. 2021 Jan 19;9:e10711. doi: 10.7717/peerj.10711 (PMC7821765; doi:10.7717/peerj.10711)
Supplement: Supplemental Information 2 — BMI, body mass index; ICD, Implantable Cardioverter Defibrillator; LVEF, left ventricle ejection fraction; LA, Left atrial dimension; LV EDD, Left ventricular end-diastolic dimension; LV ESD, Left ventricular end-systolic dimension, SCD, sudden cardiac death. [file peerj-09-10711-s002.xlsx]

## Sheet: Лист1
Supplemental file 2.
Table S1:
Patient information and clinical characteristics.
BMI, body mass index; ICD, Implantable Cardioverter Defibrillator; LVEF, left ventricle ejection fraction; LA, Left atrial dimension; LV EDD, Left ventricular end-diastolic dimension; LV ESD, Left ventricular end-systolic dimension, SCD, sudden cardiac death
*	To address issue of patient/participant anonymity we provide ages as age-ranges (e.g. 30-30, 40-49) and exclude gender information in this table.
Pat. ID	Initial Clinical Diag.	VT	Familial history of SCD or card. dis.	Age-range*	Ethnicity	BMI	NYHA Class	ICD implant.	Coronary history	Coronary artery stenting history	Syncope history	Myocardial infarction history	LVEF, %	LA, mm	LV EDD, cm	LV ESD, cm	QRS Interval, ms	QT Interval, ms
192	CHD VT	monomorphic VT	no	40-49	Russian	44.4	III	YES	YES	NO	NO	YES	53.4	37	5.8	3.8	104	338
226	CHD VT	monomorphic VT	no	60-69	Kazakh	28	III	NO	YES	YES	NO	YES	18.4	45.6	6.8	6.5	112	332
259	CHD VT	monomorphic VT	no	60-69	Ukrainian	27	III	YES	YES	YES	NO	YES	45	35	5.9	4.3	142	472
187	CHD VT	monomorphic VT	no	70-79	Kazakh	26	III	NO	YES	NO	NO	YES	35	46	6.5	4.1	100	400
270	CHD VT	monomorphic VT	no	60-69	Kazakh	22.6	III	NO	YES	NO	NO	YES	35	43	6.9	6.3	112	476
283	CHD VT	monomorphic VT	yes	60-69	Kazakh	30	II	NO	YES	NO	NO	YES	43	36	5.5	4	98	400
318	CHD VT	monomorphic VT	no	60-69	Korean	26.8	III	YES	YES	NO	NO	YES	26.1	52	8.2	7.1	100	432
319	CHD VT	monomorphic VT	no	50-59	Kazakh	25.2	III	NO	YES	NO	NO	YES	48.5	46	5	4.1	98	428
344	CHD VT	polymorphic VT	no	60-69	Kazakh	25	II	YES	YES	YES	NO	YES	23	43	8	7.1	122	416
383	CHD VT	monomorphic VT	no	60-69	Kazakh	23.8	II	YES	YES	NO	NO	YES	45	37	5	3.7	106	374
384	CHD VT	monomorphic VT	yes	30-39	Kazakh	30	III	YES	NO	YES	NO	YES	37.4	44	5.7	4	80	160
389	CHD VT	monomorphic VT	no	60-69	Kazakh	31.5	II	NO	YES	NO	YES	NO	56	36	5.2	3.9	126	430
390	CHD VT	monomorphic VT	no	60-69	Kazakh	25.5	II	NO	YES	YES	NO	YES	34.9	42	6	4	80	400
391	CHD VT	monomorphic VT	no	60-69	Russian	31	III	YES	YES	YES	NO	YES	44.8	43	6	4.8	80	400
394	CHD VT	monomorphic VT	no	70-79	Azerbaijan	34	I	YES	YES	YES	YES	NO	44.7	46	5.8	4.5	120	480
430	CHD VT	monomorphic VT	no	50-59	Russian	19.9	III	NO	YES	NO	NO	YES	26.8	43	6.4	5.6	158	450
436	CHD VT	monomorphic VT	no	60-69	Kazakh	26.6	II	YES	YES	NO	NO	YES	26.6	45	6.1	5.3	104	380
467	CHD VT	polymorphic VT	yes	70-79	Uighur	26	III	NO	NO	NO	NO	NO	67.8	26.2	4.2	2.5	80	440
526	CHD VT	polymorphic VT	yes	60-69	Russian	28.5	III	NO	YES	YES	NO	YES	32	44	6.3	5.1	92	314
533	CHD VT	monomorphic VT	no	70-79	Kazakh	19.2	III	NO	YES	NO	NO	YES	31	45	6.6	5.9	100	400
577	CHD VT	monomorphic VT	no	60-69	Kazakh	25.8	III	NO	NO	YES	NO	NO	26	52	6.5	5.6	112	352
412	CHD VT	monomorphic VT	yes	70-79	Kazakh	27.7	III	YES	YES	NO	NO	YES	20	54	8.7	8.3	206	484
552a	CHD VT	monomorphic VT	yes	50-59	Udmurt	37.6	III	YES	YES	YES	NO	YES	20.5	45	6.5	5.8	154	476
199	DCM VT	monomorphic VT	no	20-29	Kazakh	19.7	IV	NO	NO	NO	NO	NO	17.8	43	6.4	5.9	90	366
210	DCM VT	monomorphic VT	yes	40-49	Kazakh	24.8	III	NO	NO	NO	NO	NO	20	50	7.4	6.7	104	370
211	DCM VT	monomorphic VT	yes	50-59	Ukrainian	19.7	III	NO	NO	NO	NO	NO	43	41.5	6.8	5.9	158	472
212	DCM VT	monomorphic VT	no	30-39	Kazakh	25	III	NO	NO	NO	NO	NO	20	43	6	5.8	82	286
232	DCM VT	monomorphic VT	yes	2019-10-01	Kazakh	14.8	III	NO	NO	NO	NO	NO	15.2	42	7	6.2	116	360
276	DCM VT	monomorphic VT	no	40-49	Kazakh	30.9	I	NO	NO	NO	NO	NO	24	53	7.8	7.2	100	360
278	DCM VT	monomorphic VT	no	30-39	Ukrainian	32.1	IV	YES	NO	NO	NO	NO	42.4	54	8.3	8.2	182	394
279	DCM VT	monomorphic VT	no	20-29	Kazakh	25.9	III	YES	NO	NO	NO	NO	29.5	48.5	6.8	5.9	100	400
280	DCM VT	monomorphic VT	no	20-29	Kazakh	27	III	NO	NO	NO	NO	NO	22	45	6	5.6	84	342
297	DCM VT	monomorphic VT	no	40-49	Kazakh	29	III	NO	NO	NO	NO	NO	20.5	42	7	5.7	120	380
299	DCM VT	monomorphic VT	no	50-59	Russian	35.4	III	NO	NO	NO	NO	NO	27	56	7.2	6.2	120	380
304	DCM VT	monomorphic VT	no	60-69	German	24.6	III	NO	NO	NO	NO	NO	23	42	8.2	7.0	180	490
312	DCM VT	monomorphic VT	no	40-49	Uzbek	22.1	III	YES	NO	NO	NO	NO	30	35	6.6	5.9	98	400
332	DCM VT	monomorphic VT	no	30-39	Kazakh	27	IV	NO	NO	NO	NO	NO	18	45	7.8	7.3	112	370
342	DCM VT	monomorphic VT	yes	40-49	Kazakh	20.9	IV	NO	NO	NO	NO	NO	25	49	6.6	6.4	122	348
343	DCM VT	monomorphic VT	no	50-59	Kazakh	30	III	NO	NO	NO	NO	NO	36	53	7.5	6.5	160	442
350	DCM VT	monomorphic VT	no	20-29	Kazakh	19.8	IV	YES	NO	NO	NO	NO	31	48	6.1	5.5	120	399
370	DCM VT	monomorphic VT	yes	30-39	Kazakh	25.4	IV	YES	NO	NO	NO	NO	17	53	6.6	6.2	108	362
388	DCM VT	monomorphic VT	no	60-69	Kazakh	28.3	IV	NO	YES	NO	NO	NO	26.5	46	6.3	5.2	92	350
410	DCM VT	monomorphic VT	no	40-49	Kazakh	29	III	NO	NO	NO	NO	NO	16.1	48	6.5	5.8	122	404
429	DCM VT	monomorphic VT	no	60-69	Kazakh	32.8	III	NO	NO	NO	NO	NO	28	45	6.9	5.8	160	420
446	DCM VT	monomorphic VT	yes	50-59	Kazakh	32.5	IV	NO	YES	NO	NO	NO	14	69	7.5	6.8	112	394
447	DCM VT	monomorphic VT	no	50-59	Russian	24.6	IV	NO	NO	NO	NO	NO	18	41	6.6	5.9	122	370
452	DCM VT	monomorphic VT	yes	30-39	Russian	55.6	III	NO	NO	NO	NO	NO	38	72	7.3	5.6	120	404
462	DCM VT	polymorphic VT	no	40-49	Kazakh	23.5	II	NO	NO	NO	NO	NO	30	38	6.3	5.5	88	400
479	DCM VT	monomorphic VT	no	20-29	Uzbek	18.8	III	NO	NO	NO	NO	NO	23	49	7.7	6.5	114	422
480	DCM VT	monomorphic VT	no	40-49	Kazakh	31.6	III	NO		NO	YES	YES	14	43	6.9	6	126	402
574	DCM VT	monomorphic VT	no	50-59	Russian	33.5	III	NO	NO	NO	NO	NO	29	42	5.7	4.4	160	400
580	DCM VT	monomorphic VT, ventiruclar fibrillation	no	60-69	Russian	21.9	III	NO	YES	NO	YES	YES	36	43	4.4	3	90	400
371a	DCM VT	monomorphic VT	yes	50-59	Kazakh	29.7	III	YES	NO	NO	NO	NO	25	48	7.6	6.4	96	410
583	DCM VT	monomorphic VT	no	40-49	Kazakh	22.1	IV	NO	NO	NO	NO	NO	19	47	7.4	6.6	100	362
590	DCM VT	monomorphic VT	no	40-49	Kazakh	27.3	III	NO	NO	NO	NO	NO	37	40	6.2	5	100	390
243	iVT	monomorphic VT	no	2019-10-01	Kazakh	14.3	I	NO	NO	NO	NO	NO	70	19.5	4	2.8	80	360
266	iVT	monomorphic VT	no	2019-10-01	Russian	17	I	NO	NO	NO	NO	NO	67.3	24.3	3.5	2.2	80	380
267	iVT	monomorphic VT	no	30-39	Kazakh	26	I	NO	NO	NO	NO	NO	66	28	4.3	0.9	80	372
271	iVT	monomorphic VT	unknown	40-49	Korean	28	I	NO	NO	NO	NO	NO	61.3	35	4.5	3	78	450
291	iVT	monomorphic VT	no	2019-10-01	Kazakh	13.4	II	NO	NO	NO	NO	NO	61	11	1.7	1.1	54	288
308	iVT	polymorphic VT	yes	50-59	Russian	35.1	II	YES	NO	NO	YES	NO	58.6	35	5	3.8	90	400
315	iVT	polymorphic VT	yes	40-49	Russian	29.5	II	YES	NO	NO	YES	NO	36	28	5	4.7	90	488
321	iVT	monomorphic VT	unknown	50-59	Russian	25.4	I	NO	NO	NO	NO	NO	63	41	5.7	3.4	80	440
347	iVT	monomorphic VT	no	50-59	Russian	32	I	YES	YES	NO	NO	YES	57	35	4.8	3.3	126	464
357	iVT	fascicular VT	no	70-79	Kazakh	29	I	NO	NO	NO	NO	NO	65.6	32	4.6	3.2	98	414
365	iVT	fascicular VT	no	40-49	Kazakh	30	I	NO	YES	NO	NO	YES	56.5	35	4.7	3.3	100	326
387	iVT	monomorphic VT	yes	20-29	Kazakh	26.5	III	NO	NO	NO	YES	NO	72	37	5.9	5	96	428
408	iVT	polymorphic VT	no	50-59	Russian	26.5	II	NO	YES	NO	NO	NO	57.3	37	5.2	3.4	84	380
415	iVT	monomorphic VT	no	20-29	Russian	22	II	NO	NO	NO	NO	NO	63	27	4.1	2.9	80	400
427	iVT	monomorphic VT	yes	2019-10-01	Russian	16.5	I	NO	NO	NO	NO	NO	57	25	4.7	3.9	96	404
442	iVT	monomorphic VT	no	40-49	Kazakh	26.2	I	NO	NO	NO	NO	NO	63.4	34	4.7	3	96	492
460	iVT	monomorphic VT	yes	2019-10-01	Kazakh	26	I	NO	NO	NO	NO	NO	67.8	26.2	4.2	2.5	80	440
465	iVT	monomorphic VT	yes	20-29	Kazakh	25.6	I	NO	NO	NO	NO	NO	58	30	4.8	3.6	80	380
471	iVT	monomorphic VT	yes	30-39	Kazakh	27	I	NO	NO	NO	NO	NO	55	31	4.9	3.5	88	396
477	iVT	monomorphic VT	no	2019-10-01	Russian	19.2	I	NO	NO	NO	NO	NO	52.3	24.5	4.9	4.1	80	400
487	iVT	monomorphic VT	no	20-29	Russian	20	I	NO	NO	NO	NO	NO	56	30	5.5	3.8	90	380
488	iVT	monomorphic VT	yes	50-59	Kazakh	22.2	II	YES	YES	NO	NO	YES	62	28	5.2	3.5	100	400
490	iVT	ventricular fibrillation	no	50-59	Kazakh	26.5	I	NO	NO	NO	NO	NO	72	31	4.5	2.6	86	406
491	iVT	monomorphic VT	yes	40-49	Kazakh	30.2	I	YES	NO	NO	YES	NO	70	38	4.5	2.7	78	426
510	iVT	monomorphic VT	no	40-49	Azerbaijan	23.8	I	YES	NO	NO	NO	NO	60	27	4.7	3.2	78	422
511	iVT	monomorphic VT	no	40-49	Kazakh	18	I	YES	NO	NO	NO	NO	67.7	32	3.5	2.1	138	386
534	iVT	monomorphic VT	no	50-59	Russian	25.5	1	NO	NO	NO	NO	NO	52	37	5.5		96	484
535	iVT	polymorphic VT	no	50-59	Kazakh	21.5	II	NO	NO	NO	NO	NO	69	30	4	2.6	80	392
557	iVT	monomorphic VT	no	20-29	Russian	22.9	I	NO	NO	NO	YES	NO	60	27	4.2	2.7	128	328
558	iVT	monomorphic VT	no	50-59	Russian	38	II	NO	NO	NO	NO	NO	34.2	47	6.9	5.9	104	322
582	iVT	monomorphic VT	yes	2019-10-01	Kazakh	26	I	NO	NO	NO	NO	NO	70	25	3.8	2.3	80	400
354a	iVT	polymorphicVT	no	70-79	Lithuanian	32	II	YES	NO	NO	NO	NO	61.6	35	4.5	3.5	86	446
444	iVT	monomorphic VT	no	2019-10-01	Kazakh	17.7	II	NO	NO	NO	NO	NO	59	21	4.4	3	86	382
456	iVT	monomorphic VT	no	50-59	Russian	30.5	II	YES	NO	NO	NO	NO	62	35	4.9	3.3	84	380
504	iVT	monomorphic VT	yes	2019-10-01	Kazakh	17	I	YES	NO	NO	NO	NO	68.2	22.4	4.1	1.7	80	380
551	iVT	monomorphic VT	no	30-39	Kazakh	28	I	NO	NO	NO	NO	NO	60	31	4.7	3.2	100	360
233	iVT	monomorphic VT	no	50-59	Kazakh	25.8	I	NO	YES	YES	NO	NO	60	40	4.7	2.8	98	422
