# Supplementary material for: Patients with coronary heart disease, dilated cardiomyopathy and idiopathic ventricular tachycardia share overlapping patterns of pathogenic variation in cardiac risk genes
Source: PeerJ. 2021 Jan 19;9:e10711. doi: 10.7717/peerj.10711 (PMC7821765; doi:10.7717/peerj.10711)
Supplement: Supplemental Information 4 [file peerj-09-10711-s004.xlsx]

## Sheet: list of 307 variants 
									Table S2:
									Table of genetic variants
																			Number of carriers of variant in KCG
	HGMD	Cellular function/ association	Gene	Amio acid variant	CHD case ID	DCM case ID	iVT case ID	esp6500si_all		ExAC_ALL	MetaSVM_score	MetaSVM_pred	Combined pred. score	Pathogenetic Potential Class	ClinVar Classification	Varsome ACMG Classification	Final verdict according to the ACMG	Presence of variant in 60 samples KCG	1/1 (homozygous ALT)	0/1 (heterozygous)	0/0 wild
1	yes	Metabolism	GAA	A586V	344			0	0	1.741e-05	0.9399	D	9	class I	Uncertain significance	Uncertain Significance	Uncertain Significance	no
2		Metabolism	GAA	W746C	533			0.000308	0.0009	0.0003	0.9565	D	9	class I	Pathogenic/Likely pathogenic​	Pathogenic	Pathogenic	no
3	yes	Nucleus	CRYAB	R69C	319			7.7e-05	0	7.414e-05	0.8391	D	9	class I	Uncertain significance	Benign	Benign	no
4		Nucleus	CRYAB	D140Y			582	0	0	0	0.669	D	9	class I		Likely Pathogenic	Likely Pathogenic	no
5		Nucleus	RBM20	P633L		371a		0	0	6.948e-05	0.802	D	9	class I	Uncertain significance	Uncertain Significance	Uncertain Significance	no
6		Ion flux	RYR2	N1669S	467			0	0	1.658e-05	1.1038	D	9	class I	Uncertain significance	Uncertain Significance	Uncertain Significance	no
7	yes	Ion flux	RYR2	T2504M			444	0	0	8.563e-05	1.0734	D	9	class I	Uncertain significance	Benign	Benign	no
8		Ion flux	SCN5A	V263I			444	0	0	1.657e-05	1.078	D	9	class I	Uncertain significance	Uncertain Significance	Uncertain Significance	no
9		Intercalated disc	DES	S344F			442	0	0	0	0.986	D	9	class I		Likely Pathogenic	Likely Pathogenic	no
10		Ion flux	CACNA1C	A520T		480		0	0	1.964e-05	0.9085	D	9	class I	Uncertain significance	Uncertain Significance	Uncertain Significance	no
11		Metabolism	TAZ	R253Q			271	0	0	1.141e-05	1.0952	D	9	class I	Uncertain significance	Uncertain Significance	Uncertain Significance	no
12		Cytoskeleton	LAMA2	G1278V			477	0	0	0	0.3531	D	8	class I		Uncertain Significance	Uncertain Significance	no
13		Cytoskeleton	LAMA2	G2561S			582	0	0	0.0001	0.7271	D	8	class I	Uncertain significance​	Uncertain Significance	Uncertain Significance	no
14		Nucleus	LMNA	S71I			487	0	0	0	0.4639	D	8	class I		Likely Pathogenic	Likely Pathogenic	no
15		Intercalated disc	DSP	E215K			551	7.7e-05	0	6.589e-05	0.806	D	8	class I	Uncertain significance	Uncertain Significance	Uncertain Significance	no
16	yes	Sarcomere	MYH6	Q1065H			291	0	0	0.0002	0.7783	D	8	class I	Conflicting interpretations of pathogenicity​ Likely benign(1);Uncertain significance(5)	Benign	Benign	yes	0	2	58
17	yes	Sarcomere	MYPN	L1161I	318	279	387, 504	0.000231	0.0023	0.0033	0.4091	D	8	class I	Conflicting interpretations of pathogenicity​ Benign(5);Likely benign(3);Uncertain significance(2)	Benign	Benign	no
18		Nucleus	RBM20	P645L	344, 383			0	0	5.747e-05	0.3301	D	8	class I		Uncertain Significance	Uncertain Significance	no
19		Ion flux	RYR2	S2808F			582	0	0	0	1.0777	D	8	class I		Uncertain Significance	Uncertain Significance	no
20		Ion flux	RYR2	P3167L			488	0	0	0	1.0902	D	8	class I		Uncertain Significance	Uncertain Significance	no
21		Ion flux	RYR2	P4335L			233	0	0	0	0.7706	D	8	class I		Uncertain Significance	Uncertain Significance	no
22		Ion flux	SCN4B	R100H	187			0	0	8.236e-06	0.1067	D	8	class I	Uncertain significance	Uncertain Significance	Uncertain Significance	no
23	yes	Ion flux	KCNE1	R98W			271	0	0	1.653e-05	1.08	D	8	class I	Conflicting interpretations of pathogenicity​ Likely pathogenic(1);Pathogenic(1);Uncertain significance(2)	Uncertain Significance	Uncertain Significance	no
24		Intercalated disc	DES	R222H		279		0.000154	0	0.0004	0.8035	D	8	class I	Conflicting interpretations of pathogenicity​ Likely benign(4);Uncertain significance(2)	Uncertain Significance	Uncertain Significance	no
25		Intercalated disc	DES	R406Q		574		0	0	0	1.0573	D	8	class I	Uncertain significance​	Likely Pathogenic	Likely Pathogenic	no
26		Nucleus	TBX20	R392P			315	0	0	8.306e-06	0.1797	D	8	class I		Uncertain Significance	Uncertain Significance	no
27	yes	Ion flux	KCNJ2	R218Q			511	0	0	0	1.0653	D	8	class I	Pathogenic	Pathogenic	Pathogenic	no
28		Ion flux	KCNA5	D166A	390			0	0	0.0002	0.9892	D	8	class I	Uncertain significance	Benign	Benign	yes	0	1	59
29		Cytoskeleton	KRT17	D203N			357	0	0	2.475e-05	0.8813	D	8	class I		Benign	Benign	no
30		Sarcomere	MYL3	D178N		590		7.7e-05	0	0.0003	0.2612	D	8	class I	Conflicting interpretations of pathogenicity​ Likely benign(2);Uncertain significance(5)	Uncertain Significance	Uncertain Significance	no
31		Cytoskeleton	SGCB	R267C			442	7.7e-05	0	0.0022	0.9335	D	8	class I	Conflicting interpretations of pathogenicity​ Benign(3);Likely benign(2);Uncertain significance(2)	Benign	Benign	yes	0	0	60
32	yes	Sarcomere	MYBPC3	G507R			243	0.00132	0.0027	0.0007	0.491	D	7	class I	Conflicting interpretations of pathogenicity​ Benign(4);Likely benign(8);Uncertain significance(1)	Likely Pathogenic	Likely Pathogenic	no
33		Sarcomere	TTN	I6517T			427	0	0	0	0.8115	D	7	class I		Uncertain Significance	Uncertain Significance	no
34		Sarcomere	TTN	V16908I	467			0	0	0.0029	0.2904	D	7	class I		Benign	Benign	no
35		Sarcomere	TTN	P18888A	192			0	0	0	0.0224	D	7	class I		Uncertain Significance	Uncertain Significance	no
36		Sarcomere	TTN	G21938D	319			0	0	0.0001	0.5938	D	7	class I		Benign	Benign	no
37		Sarcomere	TTN	R22710H			444	0	0	2.507e-05	0.6125	D	7	class I	Uncertain significance	Likely Benign	Likely Benign	no
38		Sarcomere	TTN	R24284C		371a		0	0.0009	0.0005	0.3149	D	7	class I	Conflicting interpretations of pathogenicity​ Benign(1);Likely benign(1);Uncertain significance(1)	Benign	Benign	no
39		Sarcomere	TTN	P26378A		580		0	0	2.604e-05	0.3228	D	7	class I		Likely Benign	Likely Benign	no
40		Sarcomere	TTN	P30353T	391			0	0	0	0.2035	D	7	class I		Uncertain Significance	Uncertain Significance	no
41		Sarcomere	TTN	P33134L		304		0	0	0.0002	0.7708	D	7	class I		Likely Benign	Likely Benign	no
42		Metabolism	GAA	V909M			347	7.7e-05	0	2.478e-05	0.7276	D	7	class I	Uncertain significance	Likely Pathogenic	Likely Pathogenic	no
43		Intercalated disc	DSC2	L311I		297		0	0	8.238e-06	0.1853	D	7	class I		Uncertain Significance	Uncertain Significance	no
44	yes	Sarcomere	MYH7	E1205K		388		0	0	8.536e-06	0.8578	D	7	class I	Conflicting interpretations of pathogenicity​ Likely pathogenic(1);Uncertain significance(2)	Uncertain Significance	Uncertain Significance	no
45		Nucleus	RBM20	G181R		212		0	0	4.896e-05	0.1537	D	7	class I	Uncertain significance	Uncertain Significance	Uncertain Significance	no
46		Intercalated disc	PKP2	R695C			315	0	0.0005	0.0001	0.0319	D	7	class I	Uncertain significance	Likely Benign	Likely Benign	no
47		Cytoskeleton	LDB3	R121C			365	0	0	8.291e-06	0.3749	D	7	class I	Uncertain significance	Uncertain Significance	Uncertain Significance	no
48		Ion flux	CAV3	V39L		574		0	0	0	0.6076	D	7	class I		Likely Pathogenic	Likely Pathogenic	no
49	yes	cell membrane	PSEN1	E318G	192		487	0.01384	0.01	0.0153	0.7465	D	6	class II	Benign/Likely benign​	Benign	Benign	yes	0	3	57
50		Sarcomere	TTN	P9761S			557	0	0	8.284e-06	0.2064	D	6	class II		Uncertain Significance	Uncertain Significance	no
51		Sarcomere	TTN	N17193S		343	551	0	0	0.0006	0.0026	D	6	class II		Benign	Benign	no
52		Sarcomere	MYH6	A1674T	383			0	0	0.0001	0.0767	D	6	class II		Benign	Benign	no
53		Intercalated disc	DSC2	E882K			308	0	0	0	0.3208	D	6	class II		Uncertain Significance	Uncertain Significance	no
54		Sarcomere	MYH7	F244L		574		0	0	0	1.1311	D	6	class II	Pathogenic	Pathogenic	Pathogenic	no
55		Ion flux	HCN4	E1193Q		278		0.000154	0	0.001	0.7896	D	6	class II	Conflicting interpretations of pathogenicity​ Benign(1);Likely benign(2);Uncertain significance(1)	Benign	Benign	no
56		Ion flux	RYR2	P60S	412			0	0	0	0.7057	D	6	class II		Uncertain Significance	Uncertain Significance	no
57	yes	Intercalated disc	DES	A213V			308, 491, 444	0.010534	0.01	0.0101	0.0041	D	6	class II	Conflicting interpretations of pathogenicity​ Benign(8);Likely benign(5);Uncertain significance(1)	Benign	Benign	no
58		Sarcomere	MYO6	V140E			408	0	0	0	-0.0833	T	6	class II		Uncertain Significance	Uncertain Significance	no
59		Sarcomere	ACTN2	D491N		479		0	0	0	-0.4241	T	5	class II		Uncertain Significance	Uncertain Significance	no
60		Cell membrane	ANK2	R379C			511	7.7e-05	0	0.0007	-0.3432	T	5	class II	Benign/Likely benign	Benign	Benign	no
61		Cytoskeleton	LAMA2	A1897T			487	0	0	0.0002	-0.965	T	5	class II	Conflicting interpretations of pathogenicity​ Likely benign(1);Uncertain significance(1)	Uncertain Significance	Uncertain Significance	no
62		Cytoskeleton	LAMA2	R2231H			444	0.000154	0	0.0001	-0.8831	T	5	class II	Uncertain significance​	Uncertain Significance	Uncertain Significance	no
63		Sarcomere	TTN	G4220A		342		0	0	8.774e-05	0.1398	D	5	class II		Benign	Benign	no
64		Sarcomere	TTN	V5419L			267	0	0	0	0.0329	D	5	class II		Uncertain Significance	Uncertain Significance	yes	0	0	60
65		Sarcomere	TTN	G28727D			233	0	0	0	0.361	D	5	class II		Uncertain Significance	Uncertain Significance	no
66		Intercalated disc	DSP	R866H	533			0	0	8.238e-06	-0.6421	T	5	class II	Uncertain significance	Uncertain Significance	Uncertain Significance	no
67	yes	Sarcomere	MYH6	G56R	187, 283, 344, 383, 430	210, 299, 312, 350, 462, 480	504, 551	0.080194	0.06	0.0698	-0.3394	T	5	class II	Benign/Likely benign	Benign	Benign	yes	0	6	54
68		Sarcomere	MYH6	I806T		590		0	0	0	0.4335	D	5	class II		Uncertain Significance	Uncertain Significance	no
69	yes	Metabolism	GAA	G576S	319	410	357, 535, 582, 504	0.000769	0.05	0.0179	-1.2023	T	5	class II	Benign/Likely benign	Uncertain Significance	Uncertain Significance	yes	0	9	51
70	yes	Ion flux	KCNQ1	K393N			477	0.000692	0.0005	0.0011	0.8485	D	5	class II	Conflicting interpretations of pathogenicity​ Benign(3);Likely benign(10);Uncertain significance(1)	Likely Benign	Likely Benign	yes	0	1	59
71		Ion flux	GPD1L	T325I		297		0	0	8.265e-06	0.0018	D	5	class II		Uncertain Significance	Uncertain Significance	no
72	yes	cell membrane	PSEN2	R71W		462		0.002768	0.0023	0.0034	0.9733	D	5	class II	Benign/Likely benign	Benign	Benign	no
73		Nucleus	TBX5	N295K			233	0	0	0	-0.0259	T	5	class II		Uncertain Significance	Uncertain Significance	no
74	yes	Nucleus	TMEM43	R312W			511	0.009842	0.01	0.009	-0.1935	T	5	class II	Benign/Likely benign	Benign	Benign	yes	0	2	58
75		Sarcomere	TCAP	C8F		342		0	0	0	-0.0236	T	5	class II		Uncertain Significance	Uncertain Significance	no
76		Intercalated disc	JUP	A140V		574		0	0	0	-0.2107	T	5	class II		Uncertain Significance	Uncertain Significance	no
77		Cell membrane	ABCC9	D1164E		574		0	0	0	-0.4505	T	4	class II		Uncertain Significance	Uncertain Significance	no
78		Cytoskeleton	AKAP9	Q1619R		479		0	0	0	-1.1807	T	4	class II		Uncertain Significance	Uncertain Significance	no
79		Cytoskeleton	AKAP9	E1935A			551	0	0	0	-1.1416	T	4	class II		Uncertain Significance	Uncertain Significance	no
80		Cytoskeleton	AKAP9	R3742L	344			0	0	0	-1.1732	T	4	class II		Uncertain Significance	Uncertain Significance	no
81		cell membrane	BAG3	D41N		479		0	0	0	-0.3139	T	4	class II		Uncertain Significance	Uncertain Significance	no
82	yes	cell membrane	BAG3	R258W			271	0	0.0046	0.0012	-0.2567	T	4	class II	Benign/Likely benign	Benign	Benign	no
83		Cytoskeleton	LAMA2	T1206A			488	0	0.0005	0.0001	-0.8036	T	4	class II		Likely Benign	Likely Benign	no
84		Cytoskeleton	LAMA2	A1496V			291	0.002999	0.0037	0.0033	-0.5504	T	4	class II	Conflicting interpretations of pathogenicity​ Benign(2);Likely benign(1);Uncertain significance(6)	Benign	Benign	yes	0	2	58
85		Cytoskeleton	LAMA4	L485H		343, 480	357	0	0.0046	0.0028	-1.1567	T	4	class II		Likely Benign	Likely Benign	yes	0	6	54
86		Cytoskeleton	LAMA4	G1467R			442	0	0	0	-0.9303	T	4	class II				no
87	yes	Sarcomere	MYBPC3	R160W			233	0.000162	0.0014	0.0016	-0.3633	T	4	class II	Conflicting interpretations of pathogenicity​ Benign(5);Likely benign(6);Uncertain significance(2)	Uncertain Significance	Uncertain Significance	yes	0	2	58
88	yes	Sarcomere	MYBPC3	Q998E		410, 480	291	0	0.01	0.0052	-0.3033	T	4	class II	Benign/Likely benign	Uncertain Significance	Uncertain Significance	yes	0	3	57
89		Sarcomere	TTN	R62C		212		0	0	1.648e-05	-0.0645	T	4	class II	Uncertain significance	Uncertain Significance	Uncertain Significance	no
90		Sarcomere	TTN	Q1879K	389			0	0	0	-0.169	T	4	class II		Uncertain Significance	Uncertain Significance	no
91		Sarcomere	TTN	E2200K	187			0	0	0	-1.0464	T	4	class II		Uncertain Significance	Uncertain Significance	no
92		Sarcomere	TTN	N8894H		276		0	0	6.626e-05	-1.1832	T	4	class II		Benign	Benign	no
93		Sarcomere	TTN	F14551V		583		8.3e-05	0	0.0001	-0.2913	T	4	class II		Benign	Benign	no
94		Sarcomere	TTN	R16883C			427	0	0	2.489e-05	-0.2208	T	4	class II		Likely Benign	Likely Benign	no
95		Sarcomere	TTN	I18332T		297		0	0	1.701e-05	-0.502	T	4	class II		Uncertain Significance	Uncertain Significance	no
96		Sarcomere	TTN	R18550W			471	0	0	0.0003	-0.1085	T	4	class II		Benign	Benign	no
97		Sarcomere	TTN	G20706D			477	0.00157	0	0.001	-0.0128	T	4	class II		Benign	Benign	no
98		Sarcomere	TTN	R21700H		343	551	0	0.0014	0.0005	-0.2869	T	4	class II		Benign	Benign	no
99		Sarcomere	TTN	L22682F			233	0	0	0	-0.6012	T	4	class II		Likely Benign	Likely Benign	no
100		Sarcomere	TTN	T23012M		462, 371a		0	0.0032	0.0017	-0.5741	T	4	class II		Benign	Benign	no
101		Sarcomere	TTN	N23787T		479		0	0	0	-0.6975	T	4	class II		Uncertain Significance	Uncertain Significance	no
102		Sarcomere	TTN	V25156G	526			0.000411	0	0.0004	-0.2166	T	4	class II		Benign	Benign	no
103		Sarcomere	TTN	R26022Q			315	8.4e-05	0	0.0001	-0.1996	T	4	class II		Benign	Benign	no
104		Sarcomere	TTN	R27105Q	344			0.000248	0	0.0002	-0.2318	T	4	class II		Benign	Benign	no
105		Sarcomere	TTN	G27631R			415	0	0	0	-0.2991	T	4	class II		Uncertain Significance	Uncertain Significance	no
106		Sarcomere	TTN	G28220S			387	8.2e-05	0	0.0006	-0.1133	T	4	class II		Benign	Benign	no
107		Sarcomere	TNNC1	D62N		276		0	0	0	-0.57	T	4	class II	Uncertain significance	Uncertain Significance	Uncertain Significance	no
108		Intercalated disc	DSP	R2639Q			271	0	0.01	0.001	-0.1787	T	4	class II	Conflicting interpretations of pathogenicity​ Benign(6);Likely benign(6);Uncertain significance(1)	Likely Benign	Likely Benign	no
109		Metabolism	GAA	D91N			291	0.023066	0.02	0.0211	-0.7913	T	4	class II	Benign	Benign	Benign	yes	0	1	59
110		Cytoskeleton	DMD	S1043Y	270	280		0	0.0018	0.0004	-0.9021	T	4	class II		Uncertain Significance	Uncertain Significance	no
111		Cytoskeleton	DMD	S2261Y			442	0	0.0018	0.0004	-0.9021	T	4	class II		Benign	Benign	no
112		Cytoskeleton	DMD	S2380Y	389			0	0.0018	0.0004	-0.9021	T	4	class II		Benign	Benign	no
113		Ion flux	HCN4	R1102H	467			0	0	0.0001	0.3277	D	4	class II	Uncertain significance	Likely Benign	Likely Benign	no
114		Sarcomere	JPH2	E37K			408	0	0	0	-0.6073	T	4	class II		Uncertain Significance	Uncertain Significance	no
115		Ion flux	RYR2	E1127G		297		0.000556	0	0.0011	-0.5038	T	4	class II	Conflicting interpretations of pathogenicity​ Benign(1);Likely benign(4);Uncertain significance(3)	Benign	Benign	no
116	yes	Ion flux	KCNA5	P307S			456	0.002386	0.0023	0.0019	0.154	D	4	class II	Conflicting interpretations of pathogenicity​ Likely benign(1);Uncertain significance(1)	Benign	Benign	no
117		Nucleus	NKX2-5	P79R		199		0	0	3.9e-05	-0.1498	T	4	class II		Benign	Benign	no
118		cell membrane	TGFB3	D109V			266	0	0	0	-0.6657	T	4	class II		Uncertain Significance	Uncertain Significance	no
119		Sarcomere	TTN	A445T		297		0.000384	0	0.0002	-0.8419	T	3	class III	Conflicting interpretations of pathogenicity​ Likely benign(1);Uncertain significance(4)	Benign	Benign	yes	0	1	59
120		Sarcomere	TTN	S25901C	577		488, 233	8.2e-05	0	0.0017	-0.4783	T	3	class III		Benign	Benign	no
121		Cytoskeleton	DMD	K380N			243	0	0	0.0012	-0.7751	T	3	class III	Benign	Benign	Benign	yes	0	1	59
122	yes	Metabolism	PRKAG2	G100S	344, 436, 412	199	490	0.000846	0.01	0.0081	-0.5035	T	3	class III	Conflicting interpretations of pathogenicity​ Benign(5);Likely benign(4);Uncertain significance(1)	Benign	Benign	yes	1	4	55
123	yes	Ion flux	KCNE1	D85N	394		271	0.008765	0.01	0.0092	-0.0797	T	3	class III	Conflicting interpretations of pathogenicity, other, risk factor​ Benign(5);Likely benign(5);Uncertain significance(2)	Benign	Benign	yes	0	0	60
124	yes	Ion flux	KCNQ1	G643S		199, 210		0.006891	0.02	0.0167	0.2448	D	3	class III	Benign/Likely benign	Benign	Benign	no
125	yes	Ion flux	KCNH2	R1047L		211		0.013337	0.02	0.0088	-0.6293	T	3	class III	Conflicting interpretations of pathogenicity​ Benign(6);Likely benign(3);Uncertain significance(1)	Benign	Benign	no
126	yes	Cytoskeleton	SNTA1	A257G			266	0.001999	0.0014	0.002	-0.5517	T	3	class III	Conflicting interpretations of pathogenicity​ Likely benign(4);Uncertain significance(2)	Benign	Benign	no
127	yes	Intercalated disc	PKP2	I531S			408	0.003229	0.0027	0.0047	-0.4537	T	3	class III	Benign/Likely benign​	Benign	Benign	no
128		Ion flux	CACNB2	A511T		410		0	0	0.0008	-0.0708	T	3	class III		Benign	Benign	no
129		Cytoskeleton	LDB3	R265H		342		0	0	0.0001	-0.5766	T	3	class III	Conflicting interpretations of pathogenicity​ Likely benign(1);Uncertain significance(3)	Benign	Benign	no
130		Sarcomere	ACTN2	N478I		429		0	0	4.167e-05	-0.874	T	2	class III		Benign	Benign	no
131		Cell membrane	ANK2	A2423T	187	446	490	0	0.0018	0.0008	-0.9526	T	2	class III	Benign/Likely benign	Benign	Benign	no
132	yes	Cell membrane	ANK2	V3634D		211		0.002384	0.0018	0.0027	-0.5014	T	2	class III	Benign/Likely benign​	Benign	Benign	no
133		Cytoskeleton	LAMA4	A281G	412			0.000308	0	0.0006	-1.0804	T	2	class III	Conflicting interpretations of pathogenicity​ Likely benign(2);Uncertain significance(1)	Benign	Benign	yes	0	1	59
134	yes	Sarcomere	MYBPC3	R326Q	226, 391	210, 278		0.00249	0.0018	0.0055	-0.7825	T	2	class III	Benign/Likely benign	Benign	Benign	no
135		Sarcomere	TTN	T9237A		210, 429		0	0	0.0001	-0.9725	T	2	class III		Benign	Benign	yes	0	1	59
136		Sarcomere	TTN	V10321I	383			0.00288	0	0.0037	-0.8651	T	2	class III		Benign	Benign	no
137		Sarcomere	TTN	V13125I	436			0.000496	0	0.0008	-0.9792	T	2	class III	Conflicting interpretations of pathogenicity​ Likely benign(5);Uncertain significance(8)	Benign	Benign	no
138		Sarcomere	TTN	I15000V			308	8.3e-05	0	0.0002	-1.0652	T	2	class III	Uncertain significance	Benign	Benign	no
139		Sarcomere	TTN	I24333V	383			0.000929	0	0.0013	-1.0807	T	2	class III	Conflicting interpretations of pathogenicity​ Benign(5);Likely benign(2);Uncertain significance(8)	Benign	Benign	no
140		Sarcomere	TTN	P24901A	384			0	0	4.144e-05	-0.6845	T	2	class III	Uncertain significance​	Benign	Benign	no
141	yes	Sarcomere	TTN	M26794T	187			0.00107	0.0005	0.0022	-0.8893	T	2	class III		Benign	Benign	yes	0	1	59
142	yes	Intercalated disc	DSG2	I293V	187		315	0.0636	0.04	0.0687	-1.048	T	2	class III	Benign/Likely benign	Benign	Benign	yes	1	5	54
143		Sarcomere	MYPN	D221V	552a		243, 487, 558, 504	0	0.0009	0.0002	-0.6993	T	2	class III	Uncertain significance	Benign	Benign	yes	0	1	59
144		Nucleus	EYA4	D327N		370		0.000154	0	0.0003	-0.7131	T	2	class III	Conflicting interpretations of pathogenicity​ Likely benign(2);Uncertain significance(2)	Benign	Benign	no
145	yes	Nucleus	CSRP3	R100H		199	477	0.000539	0.0005	0.0014	-0.4956	T	2	class III	Conflicting interpretations of pathogenicity​ Benign(2);Likely benign(4);Uncertain significance(1)	Benign	Benign	no
146	yes	Ion flux	RYR2	V1810L			271	0	0	8.297e-05	-0.2347	T	2	class III	Likely benign	Benign	Benign	no
147	yes	Cell membrane	VCL	A934V			357	0.000461	0.03	0.0121	-1.0995	T	2	class III	Benign/Likely benign	Benign	Benign	yes	0	7	53
148	yes	Intercalated disc	PKP2	R811S			456	0.000384	0.0014	0.0009	-0.6358	T	2	class III	Conflicting interpretations of pathogenicity​ Benign(2);Likely benign(6);Uncertain significance(1)	Benign	Benign	no
149		Ion flux	CACNA1C	T1878M			465	0	0	0.003	-0.7294	T	2	class III		Benign	Benign	no
150		Ion flux	CACNA1C	R1973Q	552a		415	0.001652	0	0.0036	-0.9378	T	2	class III	Benign/Likely benign​	Benign	Benign	no
151		Nucleus	TMEM43	R220C	412			0	0	3.297e-05	-1.0379	T	2	class III	Likely benign	Benign	Benign	yes	0	0	60
152	yes	Nucleus	TMPO	R690C			444	0.000615	0.01	0.0151	-1.0807	T	2	class III	Conflicting interpretations of pathogenicity​ Benign(4);Likely benign(2);Uncertain significance(1)	Benign	Benign	no
153		cytoskeleton	EMD	D149H			387	0	0.0018	0.0007	-0.6584	T	2	class III	Benign	Benign	Benign	no
154		Cytoskeleton	AKAP9	V1790G			354a	0.000769	0	0.0009	-0.905	T	1	class III	Conflicting interpretations of pathogenicity​ Likely benign(5);Uncertain significance(2)	Benign	Benign	no
155		Cytoskeleton	AKAP9	T3469M	283			0	0	0.0003	-0.9621	T	1	class III	Conflicting interpretations of pathogenicity​ Likely benign(1);Uncertain significance(1)	Benign	Benign	yes	0	1
156		Cell membrane	ANK2	R2466H		479	266	0.000384	0	0.0008	-0.8567	T	1	class III	Likely benign	Benign	Benign	no
157		cell membrane	BAG3	P512S		280		0	0	0.0002	-0.7914	T	1	class III	Likely benign	Benign	Benign	no
158		Cytoskeleton	LAMA4	V900I	226			7.7e-05	0	1.649e-05	-0.8069	T	1	class III	Uncertain significance	Benign	Benign	no
159	yes	Sarcomere	MYBPC3	V896M			308	0.003748	0.0032	0.0128	-1.0226	T	1	class III	Benign/Likely benign	Benign	Benign	no
160		Sarcomere	TTN	I12472M	412			0	0.0032	0.0011	-0.7663	T	1	class III	Benign	Benign	Benign	no
161		Sarcomere	TTN	S20363N			387	8.4e-05	0	0.0006	-0.7171	T	1	class III	Likely benign	Benign	Benign	no
162		Sarcomere	TTN	T21533N		276		0	0.0009	0.0004	-0.8467	T	1	class III	Likely benign​	Benign	Benign	no
163		Sarcomere	TTN	L26629V		232		0	0	6.984e-05	-1.0125	T	1	class III		Benign	Benign	yes	0	0	60
164		Sarcomere	TTN	L33126V		446		0	0	6.984e-05	-1.0125	T	1	class III		Benign	Benign	no
165	yes	Nucleus	NPPA	V32M	187, 430, 577	280, 343	315, 347, 357, 535	0.051592	0.06	0.0562	-1.0727	T	1	class III		Benign	Benign	yes	2	11	47
166	yes	Intercalated disc	DSG2	E713K		276, 278, 304	408, 415, 477	0.058434	0.04	0.0519	-1.0974	T	1	class III	Benign/Likely benign	Benign	Benign	yes	0	4	56
167		Intercalated disc	DSP	V2219I		388		0	0	0.0006	-1.0479	T	1	class III	Benign/Likely benign​	Benign	Benign	no
168		Sarcomere	MYH6	A1130T		371a, 583		0	0.09	0.1003	-0.8773	T	1	class III	Benign/Likely benign​	Benign	Benign	yes	0	10	50
169		Metabolism	GAA	Q429R	390			0	0.0027	0.0012	-0.6844	T	1	class III	Benign/Likely benign	Benign	Benign	no
170	yes	Metabolism	GAA	E689K	270, 319, 390, 430, 533	304, 410, 452, 480	271, 357, 442, 535, 582, 504	0.029561	0.09	0.088	-1.0542	T	1	class III	Benign/Likely benign, other​	Benign	Benign	yes	0	21	39
171	yes	Cytoskeleton	DMD	E181V	319, 394	312, 446	321, 488	0.0303	0.04	0.0219	-1.0403	T	1	class III	Benign/Likely benign	Benign	Benign	yes	0	4	56
172	yes	Ion flux	KCNQ1	P448R	467	232, 410	267, 491	7.7e-05	0.03	0.0076	-0.1127	T	1	class III	Benign/Likely benign	Benign	Benign	yes	0	3	57
173	yes	Ion flux	GPD1L	I124V		452		0.001076	0.0014	0.0021	-0.997	T	1	class III	Benign/Likely benign	Benign	Benign	no
174		Nucleus	RBM20	V391M			511	0	0	0.0003	-0.598	T	1	class III	Likely benign	Benign	Benign	no
175		Nucleus	RBM20	R1057Q	552a	332, 371a	471	0.000657	0.01	0.019	-0.7578	T	1	class III		Benign	Benign	yes	0	1	59
176	yes	Ion flux	RYR2	A1136V			534	0.009507	0.0037	0.0071	-0.9633	T	1	class III	Benign/Likely benign	Benign	Benign	yes	0	0	60
177	yes	Nucleus	TBX20	A63T			442, 471	7.7e-05	0.0009	0.0007	-0.5679	T	1	class III		Benign	Benign	yes	0	3	57
178		Nucleus	TMEM43	D201N	384			0	0.0014	0.0001	-1.0949	T	1	class III	Conflicting interpretations of pathogenicity​ Likely benign(1);Uncertain significance(1)	Benign	Benign	no
179		Intercalated disc	NEBL	I434M			387	0	0.0018	0.0003	-1.0733	T	1	class III	Likely benign	Benign	Benign	no
180	yes	Nucleus	ANKRD1	A276V		583		0.004152	0.0005	0.0029	-0.7893	T	3	class III	Conflicting interpretations of pathogenicity​ Benign(6);Likely benign(5);Uncertain significance(1)	Likely Benign	Likely Benign	no
181		Cytoskeleton	LAMA2	E308K			308	0.00123	0	0.0011	-0.8207	T	3	class III	Conflicting interpretations of pathogenicity​ Likely benign(1);Uncertain significance(5)	Likely Benign	Likely Benign	no
182		Sarcomere	TTN	R8526Q		429		0.000331	0	4.141e-05	-0.9562	T	3	class III		Likely Benign	Likely Benign	no
183		Sarcomere	TTN	P8833L			487	8.3e-05	0	6.718e-05	-0.2065	T	3	class III		Likely Benign	Likely Benign	no
184	yes	Sarcomere	MYH7	S1491C		580	267, 488	0.008611	0.01	0.0075	-0.2855	T	3	class III	Benign	Likely Benign	Likely Benign	no
185		Cytoskeleton	AKAP9	K1335I		332		0	0	0	-0.8888	T	2	class III		Likely Benign	Likely Benign	no
186		Cytoskeleton	LAMA2	W739C		371a		0	0.0009	0.0009	-1.1258	T	2	class III	Conflicting interpretations of pathogenicity​ Benign(1);Likely benign(1);Uncertain significance(1)	Likely Benign	Likely Benign	yes	0	1	59
187		Cytoskeleton	LAMA4	A1436V			471	0	0	8.247e-06	-0.9994	T	2	class III	Uncertain significance	Likely Benign	Likely Benign	no
188		Sarcomere	TTN	V6367L	344		488	0	0	0	-1.0153	T	2	class III		Likely Benign	Likely Benign	no
189		Sarcomere	TTN	I8559T	226			0	0	0	-1.0411	T	2	class III		Likely Benign	Likely Benign	no
190		Sarcomere	TTN	S8700T			488	0	0	8.899e-06	-0.7748	T	2	class III		Likely Benign	Likely Benign	yes	0	0	60
191		Sarcomere	TTN	R24051C			271	0	0	4.142e-05	-0.5539	T	2	class III		Likely Benign	Likely Benign	no
192		Sarcomere	TTN	K24714E		410		0	0	2.486e-05	-0.7066	T	2	class III		Likely Benign	Likely Benign	no
193		Sarcomere	TTN	S33404I	412			0	0	4.193e-05	-0.8187	T	2	class III		Likely Benign	Likely Benign	no
194		Intercalated disc	DSG2	R261H	391			0	0	0	-1.0886	T	2	class III	Conflicting interpretations of pathogenicity​ Likely benign(1);Uncertain significance(1)	Likely Benign	Likely Benign	no
195		Cytoskeleton	DMD	Q256R	192			0	0	8.485e-05	-0.3717	T	2	class III	Conflicting interpretations of pathogenicity​ Likely benign(2);Uncertain significance(1)	Likely Benign	Likely Benign	no
196		Cytoskeleton	DMD	Q544K		583		0	0	0	-0.1938	T	2	class III		Likely Benign	Likely Benign	no
197		Cytoskeleton	DMD	R2779Q			442	0	0	3.429e-05	-0.9916	T	2	class III	Conflicting interpretations of pathogenicity​ Likely benign(1);Uncertain significance(2)	Likely Benign	Likely Benign	no
198		Nucleus	EYA4	A275T			444	0	0	8.262e-06	-0.9426	T	2	class III		Likely Benign	Likely Benign	no
199		Intercalated disc	DSC3	L457W			233	0	0.0005	0.0002	-0.9861	T	2	class III		Likely Benign	Likely Benign	yes	0	0	60
200		Cytoskeleton	SNTA1	R225T	436			0	0	0	-1.0488	T	2	class III		Likely Benign	Likely Benign	no
201		Ion flux	CACNA2D1	G471S	526	304		7.7e-05	0	0	-0.8025	T	2	class III		Likely Benign	Likely Benign	no
202		Sarcomere	MYLK2	G62W			551	0	0	0	-0.856	T	2	class III		Likely Benign	Likely Benign	no
203		Cytoskeleton	LAMA4	V414M			491	0	0	0	-1.046	T	1	class III		Likely Benign	Likely Benign	yes	0	0	60
204		Metabolism	LAMP2	A100E			558	0	0	0	-1.0673	T	1	class III		Likely Benign	Likely Benign	no
205		Sarcomere	TTN	E3417K		280		0	0	7.301e-05	-0.9521	T	1	class III	Conflicting interpretations of pathogenicity​ Likely benign(2);Uncertain significance(2)	Likely Benign	Likely Benign	no
206		Sarcomere	TTN	M3672T		371a		0	0	0	-0.9911	T	1	class III		Likely Benign	Likely Benign	yes	0	1	59
207		Sarcomere	TTN	L4061F		212		0	0	0	-0.9924	T	1	class III		Likely Benign	Likely Benign	no
208		Sarcomere	TTN	L4776S			415	0	0	0.0016	-0.8046	T	1	class III	Conflicting interpretations of pathogenicity​ Benign(2);Uncertain significance(2)	Likely Benign	Likely Benign	no
209		Sarcomere	TTN	T6560I		210		0	0	0	-0.8908	T	1	class III		Likely Benign	Likely Benign	no
210		Sarcomere	TTN	T6928N		280		0	0	5.817e-05	-0.6975	T	1	class III		Likely Benign	Likely Benign	no
211		Sarcomere	TTN	P12536L		312, 388		0	0	0	-0.5496	T	1	class III		Likely Benign	Likely Benign	no
212		Sarcomere	TTN	I14910M			535	0	0	3.479e-05	-0.9997	T	1	class III	Uncertain significance​	Likely Benign	Likely Benign	no
213		Sarcomere	TTN	S20528F	318			0	0	1.658e-05	-0.5165	T	1	class III		Likely Benign	Likely Benign	no
214		Sarcomere	TTN	A26427T			308	0	0	5.814e-05	-0.95	T	1	class III		Likely Benign	Likely Benign	no
215		Intercalated disc	DSP	A1688T	389			0	0	5.822e-05	-1.0207	T	1	class III	Uncertain significance	Likely Benign	Likely Benign	yes	0	0	60
216		Intercalated disc	DSP	T2267S	318			0	0.0014	0.0003	-0.9685	T	1	class III	Benign/Likely benign​	Likely Benign	Likely Benign	no
217		Metabolism	GAA	T23A			387	0	0	0.0001	-0.7233	T	1	class III	Uncertain significance	Likely Benign	Likely Benign	no
218		Cytoskeleton	DMD	V1024I			558	0	0	1.619e-05	-1.0539	T	1	class III		Likely Benign	Likely Benign	no
219		Sarcomere	JPH2	H335P	526			0	0	8.49e-06	-1.027	T	1	class III		Likely Benign	Likely Benign	no
220		Nucleus	RBM20	P207S	226			0	0	0	-0.7847	T	1	class III		Likely Benign	Likely Benign	no
221		Nucleus	RBM20	T360A			551	0	0	0	-0.8018	T	1	class III		Likely Benign	Likely Benign	yes	0	1	59
222		Nucleus	RBM20	G379R			490	0	0	0.0009	-0.8309	T	1	class III	Conflicting interpretations of pathogenicity​ Likely benign(2);Uncertain significance(1)	Likely Benign	Likely Benign	no
223		Ion flux	SCN1B	G257R		370		0.002405	0	0.0017	-0.6722	T	1	class III	Benign/Likely benign​	Likely Benign	Likely Benign	no
224		Ion flux	SCN1B	R261Q	394			0	0	0.0002	-0.7543	T	1	class III	Uncertain significance	Likely Benign	Likely Benign	no
225		Intercalated disc	PKP2	D96E		232		0	0	3.296e-05	-0.7307	T	1	class III		Likely Benign	Likely Benign	yes	0	1	59
226		Ion flux	CACNA2D1	A955V		479		0	0	0	-0.7	T	1	class III	Uncertain significance	Likely Benign	Likely Benign	no
227		Intercalated disc	RANGRF	T176S		280		0	0	0	-0.8449	T	1	class III		Likely Benign	Likely Benign	no
228		Intercalated disc	DES	L69P	344			0	0	0	-0.4278	T	2	class III		Likely Pathogenic	Likely Pathogenic	no
229	yes	Sarcomere	MYBPC3	R733C		590		0	0	8.557e-05	-0.8495	T	1	class III	Uncertain significance	Likely Pathogenic	Likely Pathogenic	no
230	yes	Nucleus	CSRP3	W4R			471	0.003697	0.0027	0.0024	-0.4398	T	1	class III	Conflicting interpretations of pathogenicity​ Benign(2);Likely benign(5);Uncertain significance(3)	Likely Pathogenic	Likely Pathogenic	yes	0	1	59
231		Nucleus	LMNA	Q353X		350		0	0	0	.	.	2	class III	Pathogenic	Pathogenic	Pathogenic	no
232		Sarcomere	TTN	R5338X			582	0	0	0	.	.	2	class III		Pathogenic	Pathogenic	no
233		Sarcomere	TTN	L17465X		210		0	0	0	.	.	1	class III		Pathogenic	Pathogenic	no
234		Sarcomere	TTN	W21011X		342		0	0	0	.	.	1	class III		Pathogenic	Pathogenic	no
235		Intercalated disc	DSG2	c.2334+1G>A		410		0	0	0	.	.	1	class III		Pathogenic	Pathogenic	no
236	yes	Ion flux	KCNQ1	c.477+1G>A		574		0	0	1.648e-05	.	.	1	class III		Pathogenic	Pathogenic	no
237		Sarcomere	TTN	G17271A	526			0	0	0	-0.6365	T	3	class III		Uncertain Significance	Uncertain Significance	no
238		Cell membrane	CHRM2	F447L		452		0	0	0	-0.2779	T	3	class III		Uncertain Significance	Uncertain Significance	no
239		Sarcomere	JPH2	M292T	383			0	0	0	-1.0486	T	3	class III	Uncertain significance	Uncertain Significance	Uncertain Significance	no
240		Nucleus	TBX20	P380L			387	0	0	0	-0.2601	T	3	class III		Uncertain Significance	Uncertain Significance	no
241		Cytoskeleton	LAMA2	P790S		199		0	0	0	-0.6589	T	2	class III		Uncertain Significance	Uncertain Significance	no
242		Sarcomere	TTN	Q4713H			534	0.000334	0	0.0002	-0.7737	T	2	class III		Uncertain Significance	Uncertain Significance	no
243		Sarcomere	TTN	V7221L			558	0	0	0	-0.8021	T	2	class III		Uncertain Significance	Uncertain Significance	no
244		Sarcomere	TTN	V7301I	533		267	0	0	0	-0.2551	T	2	class III		Uncertain Significance	Uncertain Significance	no
245		Sarcomere	TTN	T8004N		446		0	0	0	-0.9387	T	2	class III		Uncertain Significance	Uncertain Significance	no
246		Sarcomere	TTN	T8741I			267, 582	0	0	0	-0.8212	T	2	class III		Uncertain Significance	Uncertain Significance	yes	0	1	59
247		Sarcomere	TTN	E10910G		479		0	0	0	-0.9322	T	2	class III		Uncertain Significance	Uncertain Significance	no
248		Sarcomere	TTN	A24822G		279		0	0	0	-0.7621	T	2	class III		Uncertain Significance	Uncertain Significance	no
249		Sarcomere	TTN	S28858C			415	0	0	0	-0.6097	T	2	class III		Uncertain Significance	Uncertain Significance	no
250		Metabolism	GAA	T182R			408	0	0	6.274e-05	-0.8494	T	2	class III	Uncertain significance	Uncertain Significance	Uncertain Significance	no
251		Nucleus	EYA4	S11A	283			0	0	0	-0.13	T	2	class III		Uncertain Significance	Uncertain Significance	yes	0	1	59
252		Intercalated disc	DSC3	P228L			444	0	0.0009	9.118e-05	-0.7111	T	2	class III		Uncertain Significance	Uncertain Significance	yes	0	0	60
253		Cell membrane	CHRM2	R211Q		279		0	0	1.662e-05	-1.0404	T	2	class III		Uncertain Significance	Uncertain Significance	no
254	yes	Sarcomere	MYH7	A561T			582	0	0	4.118e-05	-0.3663	T	2	class III	Conflicting interpretations of pathogenicity​ Pathogenic(1);Uncertain significance(1)	Uncertain Significance	Uncertain Significance	no
255		Ion flux	RYR2	R844G		350		0	0	0	-0.3166	T	2	class III		Uncertain Significance	Uncertain Significance	no
256		Ion flux	CACNA2D1	L1080F		371a		7.7e-05	0	2.482e-05	-0.8347	T	2	class III		Uncertain Significance	Uncertain Significance	no
257		Nucleus	NUP155	P100S			557	0	0	1.661e-05	-1.0275	T	2	class III		Uncertain Significance	Uncertain Significance	no
258		Nucleus	NUP155	M139V		462		0	0	7.424e-05	-0.6136	T	2	class III		Uncertain Significance	Uncertain Significance	no
259		Nucleus	NUP155	A404V		429		0	0	0.0001	-0.6831	T	2	class III		Uncertain Significance	Uncertain Significance	no
260		Sarcomere	NEXN	Q623X			551	0	0	0	.	.	2	class III		Uncertain Significance	Uncertain Significance	no
261		Ion flux	CASQ2	M257I			387	0	0	0	-0.4927	T	2	class III		Uncertain Significance	Uncertain Significance	no
262		Cell membrane	ANK2	E1923K	383	388		0	0	0.0016	-0.61	T	1	class III		Uncertain Significance	Uncertain Significance	no
263		Cytoskeleton	LAMA4	S1400X			465	0	0	0	.	.	1	class III		Uncertain Significance	Uncertain Significance	no
264		Sarcomere	TTN	E4306K			504	8.3e-05	0	6.556e-05	-0.7398	T	1	class III		Uncertain Significance	Uncertain Significance	no
265		Sarcomere	TTN	E12170V		429		0.002616	0	0.0023	-0.8222	T	1	class III	Conflicting interpretations of pathogenicity​ Benign(2);Likely benign(1);Uncertain significance(1)	Uncertain Significance	Uncertain Significance	no
266		Sarcomere	TTN	T18719M		212		0	0.0005	3.375e-05	-0.7238	T	1	class III		Uncertain Significance	Uncertain Significance	no
267		Metabolism	GAA	T52A			551	0	0	0	-0.6727	T	1	class III		Uncertain Significance	Uncertain Significance	no
268		Metabolism	GAA	N140K		583		0	0	1.72e-05	-0.3376	T	1	class III		Uncertain Significance	Uncertain Significance	yes	0	1	59
269		Metabolism	GAA	S484P	192			0	0	0	-0.5051	T	1	class III		Uncertain Significance	Uncertain Significance	no
270		Sarcomere	MYPN	Q1111L		304		0	0	0	-0.6854	T	1	class III		Uncertain Significance	Uncertain Significance	no
271		Metabolism	PRKAG2	H222Q	577			0	0	0	-0.6491	T	1	class III		Uncertain Significance	Uncertain Significance	no
272		Cytoskeleton	KRT17	K262X	391			0.000384	0	0.0002	.	.	1	class III	Pathogenic	Uncertain Significance	Uncertain Significance	no
273		Sarcomere	NEXN	E268A			456	0.002017	0	0.004	-0.4392	T	1	class III	Conflicting interpretations of pathogenicity​ Benign(7);Likely benign(1);Uncertain significance(2)	Uncertain Significance	Uncertain Significance	yes	0	2	58
274		Sarcomere	TNNI3	c.107+2T>G	526	232, 574	291	0	0	0	.	.	1	class III				no
275		Cytoskeleton	AKAP9	c.4004_4004delinsAAAC	226	574	267, 582, 354a	0	0	0	-0.8888	T	0	class IV				no
276		Cytoskeleton	AKAP9	K1335R	552a			0	0	0	-0.8888	T	0	class IV		Likely Benign	Likely Benign	no
277		Cytoskeleton	AKAP9	V2189I			471	0	0	0	-0.9779	T	0	class IV	Uncertain significance	Likely Benign	Likely Benign	no
278		Cytoskeleton	AKAP9	E2438D		199		7.7e-05	0	8.304e-05	-1.0128	T	0	class IV	Uncertain significance	Benign	Benign	no
279		Cell membrane	ANK2	D2326G		280		0	0	8.27e-06	-1.0541	T	0	class IV		Likely Benign	Likely Benign	no
280		Cell membrane	ANK2	Y2808C			243	0	0	5.773e-05	-1.0273	T	0	class IV		Benign	Benign	no
281		Cytoskeleton	LAMA2	K798E		312	291	0	0	1.651e-05	-1.0139	T	0	class IV		Likely Benign	Likely Benign	yes	0	1	59
282	yes	Cytoskeleton	LAMA2	G1584S	192, 389	446		0.024681	0.02	0.0196	-1.0147	T	0	class IV	Benign​	Benign	Benign	yes	0	0	60
283	yes	Cytoskeleton	LAMA2	V1138M	187, 318, 467, 577	232, 276, 280, 297, 299, 304, 343, 388, 480	271, 291	0.091112	0.11	0.0687	-1.053	T	0	class IV	Benign/Likely benign	Benign	Benign	yes	1	13	46
284		Cytoskeleton	LAMA2	R1791K		480		0	0	0	-0.9328	T	0	class IV		Likely Benign	Likely Benign	no
285	yes	Cytoskeleton	LAMA2	R1844S	383	580	315, 415, 557	0.012686	0.01	0.0107	-0.9596	T	0	class IV	Conflicting interpretations of pathogenicity​ Benign(3);Likely benign(2);Uncertain significance(1)	Benign	Benign	yes	0	1	59
286	yes	Sarcomere	MYBPC3	G263R			488	8.4e-05	0	0.0002	-1.0229	T	0	class IV	Uncertain significance	Likely Pathogenic	Likely Pathogenic	no
287	yes	Sarcomere	MYBPC3	S236G	383, 391, 526, 533	279, 312, 342, 350, 371a	491, 456	0.10344	0.09	0.1079	-1.0552	T	0	class IV	Benign/Likely benign	Benign	Benign	yes	0	15	45
288		Sarcomere	TTN	T3833P	390			0	0	0	-1.0376	T	0	class IV		Likely Benign	Likely Benign	no
289		Sarcomere	TTN	A3879T			471	0	0	0.0001	-1.0186	T	0	class IV		Likely Benign	Likely Benign	no
290		Sarcomere	TTN	T4976K		410		0	0	0	-0.8619	T	0	class IV		Likely Benign	Likely Benign	no
291		Sarcomere	TTN	P12337S		574		0	0	0.0202	#N/A	#N/A	0	class IV	Benign​	Benign	Benign	no
292		Sarcomere	TTN	L12918S	259, 383	232	291, 551	0	0.08	0.0986	#N/A	#N/A	0	class IV	Benign	Benign	Benign	no
293	yes	Nucleus	NPPA	S64R		297		0.001999	0.0009	0.0019	-1.0031	T	0	class IV	Conflicting interpretations of pathogenicity​ Benign(1);Uncertain significance(1)	Likely Benign	Likely Benign	no
294	yes	Intercalated disc	DSG2	G678A		276		0.000161	0	4.141e-05	-1.0154	T	0	class IV	Uncertain significance	Likely Benign	Likely Benign	no
295		Intercalated disc	DSP	V30M			551	0.001243	0.0018	0.0031	-1.1277	T	0	class IV	Conflicting interpretations of pathogenicity​ Benign(1);Likely benign(6);Likely pathogenic(1);Uncertain significance(3)	Benign	Benign	yes	0	1	59
296		Sarcomere	MYH6	V1613A	283			0.015454	0.03	0.0146	-1.0648	T	0	class IV	Benign/Likely benign	Benign	Benign	yes	0	1	59
297		Metabolism	GAA	P86R		480	460	0	0	0.0006	-0.5764	T	0	class IV	Conflicting interpretations of pathogenicity​ Benign(1);Likely benign(2);Uncertain significance(1)	Uncertain Significance	Uncertain Significance	no
298	yes	Intercalated disc	DSC2	V303L	391, 394			0	0	0	-0.9429	T	0	class IV		Likely Benign	Likely Benign	no
299	yes	Sarcomere	JPH2	G505S		480	504	0.007051	0.01	0.053	-1.0611	T	0	class IV	Benign	Benign	Benign	no
300		Cytoskeleton	SNTA1	T262P			557	0.000154	0	0.0003	-1.0358	T	0	class IV	Conflicting interpretations of pathogenicity​ Likely benign(2);Uncertain significance(3)	Benign	Benign	no
301		Cytoskeleton	SNTA1	R336Q	394			0.000154	0	2.988e-05	-0.944	T	0	class IV	Uncertain significance	Benign	Benign	no
302	yes	cytoskeleton	FKTN	G125S			291, 511	0.036906	0.04	0.0153	-0.8523	T	0	class IV	Benign	Benign	Benign	yes	0	1	59
303		Ion flux	CACNB2	c.121-2A>ATTTTTA)			321	0	0	0	#N/A	#N/A	0	class IV				no
304	yes	Ion flux	CACNB2	D537E			487	0.000308	0	0.0006	-0.9834	T	0	class IV	Conflicting interpretations of pathogenicity​ Likely benign(3);Uncertain significance(3)	Benign	Benign	no
305		Nucleus	NUP155	L5F	526			0	0	0	-0.9746	T	0	class IV		Uncertain Significance	Uncertain Significance	no
306		Intercalated disc	NEBL	A592V			511	0	0	4.278e-05	-0.9614	T	0	class IV	Conflicting interpretations of pathogenicity​ Likely benign(1);Uncertain significance(1)	Likely Benign	Likely Benign	no
307		Sarcomere	NEXN	K139N			357	0	0	0	-0.9796	T	0	class IV		Likely Benign	Likely Benign	no
																			5
																			58

## Sheet: found_rows_58_in KCG
Chr	Start	End	Ref	Alt	Func.refGene	Gene.refGene	GeneDetail.refGene	ExonicFunc.refGene	AAChange.refGene	Func.knownGene	Gene.knownGene	GeneDetail.knownGene	ExonicFunc.knownGene	AAChange.knownGene	Func.ensGene	Gene.ensGene	GeneDetail.ensGene	ExonicFunc.ensGene	AAChange.ensGene	snp138	avsnp138	avsnp150	ALL.sites.2015_08	AFR.sites.2015_08	AMR.sites.2015_08	SAS.sites.2015_08	EUR.sites.2015_08	EAS.sites.2015_08	esp6500siv2_ea	esp6500siv2_all	esp6500siv2_aa	PopFreqMax	1000G_ALL	1000G_AFR	1000G_AMR	1000G_EAS	1000G_EUR	1000G_SAS	ExAC_ALL	ExAC_AFR	ExAC_AMR	ExAC_EAS	ExAC_FIN	ExAC_NFE	ExAC_OTH	ExAC_SAS	ESP6500siv2_ALL	ESP6500siv2_AA	ESP6500siv2_EA
chr1	11907648	11907648	C	T	exonic	NPPA	.	nonsynonymous SNV	NPPA:NM_006172:exon1:c.G94A:p.V32M,	exonic	NPPA	.	nonsynonymous SNV	NPPA:uc001ati.3:exon1:c.G94A:p.V32M,	exonic	ENSG00000175206	.	nonsynonymous SNV	ENSG00000175206:ENST00000376480:exon1:c.G94A:p.V32M,	rs5063	rs5063	rs5063	0.0734824	0.0613	0.0476	0.1053	0.0348	0.1151	0.0471	0.0516	0.0604	0.12	0.073	0.061	0.048	0.12	0.035	0.11	0.056	0.06	0.048	0.11	0.025	0.042	0.038	0.1	0.052	0.06	0.047
chr1	78395131	78395131	A	C	exonic	NEXN	.	nonsynonymous SNV	NEXN:NM_001172309:exon8:c.A803C:p.E268A	exonic	NEXN	.	nonsynonymous SNV	NEXN:uc001did.1:exon5:c.A725C:p.E242A	exonic	ENSG00000162614	.	nonsynonymous SNV	ENSG00000162614:ENST00000330010:exon8:c.A803C:p.E268A	rs201763096	rs201763096	rs201763096	0.00319489	.	0.0014	0.0133	0.002	.	0.0024	0.002	0.0011	0.013	0.0032	.	0.0014	.	0.002	0.013	0.004	0.0013	0.0015	0.0002	0.0071	0.0028	0.0078	0.013	0.002	0.0011	0.0024
chr1	237730059	237730059	C	T	exonic	RYR2	.	nonsynonymous SNV	RYR2:NM_001035:exon28:c.C3407T:p.A1136V,	exonic	RYR2	.	nonsynonymous SNV	RYR2:uc001hyl.1:exon28:c.C3407T:p.A1136V,	exonic	ENSG00000198626	.	nonsynonymous SNV	ENSG00000198626:ENST00000542537:exon27:c.C3359T:p.A1120V	rs72549415	rs72549415	rs72549415	0.00239617	.	0.0014	.	0.0109	.	0.013	0.0095	0.0024	0.013	0.0024	.	0.0014	.	0.011	.	0.0071	0.0014	0.0016	0	0.0051	0.011	0.01	0.001	0.0095	0.0024	0.013
chr10	69881857	69881857	A	T	exonic	MYPN	.	nonsynonymous SNV	MYPN:NM_032578:exon2:c.A662T:p.D221V	exonic	MYPN	.	nonsynonymous SNV	MYPN:uc001jno.4:exon2:c.A662T:p.D221V	exonic	ENSG00000138347	.	nonsynonymous SNV	ENSG00000138347:ENST00000358913:exon2:c.A662T:p.D221V	rs185841477	rs185841477	rs185841477	0.000798722	.	.	0.002	0.001	0.001	.	.	.	0.0044	0.0008	.	.	0.001	0.001	0.002	0.0002	0	0	0.0001	0.0003	0.0001	0.0044	0.0006	.	.	.
chr10	75871722	75871722	C	T	exonic	VCL	.	nonsynonymous SNV	VCL:NM_014000:exon19:c.C2801T:p.A934V,	exonic	VCL	.	nonsynonymous SNV	VCL:uc010qky.1:exon18:c.C2522T:p.A841V	exonic	ENSG00000035403	.	nonsynonymous SNV	ENSG00000035403:ENST00000436396:exon12:c.C1817T:p.A606V	rs16931179	rs16931179	rs16931179	0.0217652	0.0008	0.0245	0.002	0.006	0.0823	0.0005	0.0005	0.0005	0.082	0.022	0.0008	0.025	0.082	0.006	0.002	0.012	0.0007	0.038	0.075	0.032	0.0017	0.012	0.002	0.0005	0.0005	0.0005
chr10	112541445	112541445	A	G	exonic	RBM20	.	nonsynonymous SNV	RBM20:NM_001134363:exon2:c.A1078G:p.T360A,	exonic	RBM20	.	nonsynonymous SNV	RBM20:uc001kzf.2:exon2:c.A1078G:p.T360A,	exonic	ENSG00000203867	.	nonsynonymous SNV	ENSG00000203867:ENST00000369519:exon2:c.A1078G:p.T360A,	.	.	.	.	.	.	.	.	.	.	.	.	.	.	.	.	.	.	.	.	.	.	.	.	.	.	.	.	.	.
chr10	112581547	112581547	G	A	exonic	RBM20	.	nonsynonymous SNV	RBM20:NM_001134363:exon11:c.G3170A:p.R1057Q,	exonic	RBM20	.	nonsynonymous SNV	RBM20:uc001kzf.2:exon11:c.G3170A:p.R1057Q,	exonic	ENSG00000203867	.	nonsynonymous SNV	ENSG00000203867:ENST00000369519:exon11:c.G3170A:p.R1057Q,	rs188054898	rs188054898	rs188054898	0.0175719	0.0008	.	0.0665	.	0.0218	.	0.0007	0.0022	0.067	0.018	0.0008	.	0.022	.	0.067	0.019	0.0028	0.0025	0.037	0	0.0001	0.0083	0.048	0.0007	0.0022	.
chr11	2608850	2608850	G	T	exonic	KCNQ1	.	nonsynonymous SNV	KCNQ1:NM_000218:exon9:c.G1179T:p.K393N	exonic	KCNQ1	.	nonsynonymous SNV	KCNQ1:uc009ydp.2:exon7:c.G531T:p.K177N	exonic	ENSG00000053918	.	nonsynonymous SNV	ENSG00000053918:ENST00000155840:exon9:c.G1179T:p.K393N	rs12720457	rs12720457	rs12720457	0.000599042	.	0.0014	.	0.002	.	0.0008	0.0007	0.0005	0.0022	0.0006	.	0.0014	.	0.002	.	0.0011	0.0003	0.0014	0	0.0008	0.0012	0.0022	0.0015	0.0007	0.0005	0.0008
chr11	2610034	2610034	C	G	exonic	KCNQ1	.	nonsynonymous SNV	KCNQ1:NM_000218:exon10:c.C1343G:p.P448R	exonic	KCNQ1	.	nonsynonymous SNV	KCNQ1:uc009ydp.2:exon8:c.C695G:p.P232R	exonic	ENSG00000053918	.	nonsynonymous SNV	ENSG00000053918:ENST00000155840:exon10:c.C1343G:p.P448R	rs12720449	rs12720449	rs12720449	0.0225639	.	.	0.002	.	0.1101	0.0001	7.7e-05	.	0.11	0.023	.	.	0.11	.	0.002	0.0076	0.0003	0.0003	0.098	0.0002	0.0003	0.008	0.0019	0.0001	.	0.0001
chr11	47355475	47355475	G	C	exonic	MYBPC3	.	nonsynonymous SNV	MYBPC3:NM_000256:exon27:c.C2992G:p.Q998E,	exonic	MYBPC3	.	nonsynonymous SNV	MYBPC3:uc021qir.1:exon26:c.C1948G:p.Q650E	exonic	ENSG00000134571	.	nonsynonymous SNV	ENSG00000134571:ENST00000256993:exon26:c.C2989G:p.Q997E	rs11570112	rs11570112	rs11570112	0.0061901	.	0.0303	.	.	0.0099	.	.	.	0.09	0.0062	.	0.03	0.0099	.	.	0.0052	0.0004	0.09	0.032	0	0.0002	0	0.0009	.	.	.
chr11	47370041	47370041	T	C	exonic	MYBPC3	.	nonsynonymous SNV	MYBPC3:NM_000256:exon6:c.A706G:p.S236G,	exonic	MYBPC3	.	nonsynonymous SNV	MYBPC3:uc021qis.1:exon6:c.A706G:p.S236G,	exonic	ENSG00000134571	.	nonsynonymous SNV	ENSG00000134571:ENST00000256993:exon6:c.A706G:p.S236G	rs3729989	rs3729989	rs3729989	0.0670927	0.0431	0.0836	0.0532	0.1412	0.0268	0.1263	0.1034	0.0574	0.14	0.067	0.043	0.084	0.027	0.14	0.053	0.11	0.062	0.048	0.031	0.14	0.14	0.11	0.075	0.1	0.057	0.13
chr11	47371592	47371592	G	A	exonic	MYBPC3	.	nonsynonymous SNV	MYBPC3:NM_000256:exon4:c.C478T:p.R160W,	exonic	MYBPC3	.	nonsynonymous SNV	MYBPC3:uc021qis.1:exon4:c.C478T:p.R160W,	exonic	ENSG00000134571	.	nonsynonymous SNV	ENSG00000134571:ENST00000256993:exon4:c.C478T:p.R160W	rs193068692	rs193068692	rs193068692	0.000599042	.	0.0043	.	.	.	0.0001	0.0002	0.0002	0.049	0.0006	.	0.0043	.	.	.	0.0016	0	0.049	0.0022	0	0.0002	0	0.0001	0.0002	0.0002	0.0001
chr12	5153810	5153810	A	C	exonic	KCNA5	.	nonsynonymous SNV	KCNA5:NM_002234:exon1:c.A497C:p.D166A,	exonic	KCNA5	.	nonsynonymous SNV	KCNA5:uc001qni.4:exon1:c.A497C:p.D166A,	exonic	ENSG00000130037	.	nonsynonymous SNV	ENSG00000130037:ENST00000252321:exon1:c.A497C:p.D166A,	.	.	rs748629738	.	.	.	.	.	.	.	.	.	0.0004	.	.	.	.	.	.	0.0002	0	0	0	0.0002	0.0004	0	0	.	.	.
chr12	33031902	33031902	A	C	exonic	PKP2	.	nonsynonymous SNV	PKP2:NM_001005242:exon2:c.T288G:p.D96E	exonic	PKP2	.	nonsynonymous SNV	PKP2:uc001rlj.4:exon2:c.T288G:p.D96E	exonic	ENSG00000057294	.	nonsynonymous SNV	ENSG00000057294:ENST00000070846:exon2:c.T288G:p.D96E	.	.	rs762825735	.	.	.	.	.	.	.	.	.	0.0005	.	.	.	.	.	.	0	0	0	0.0005	0	0	0	0	.	.	.
chr14	23855645	23855645	A	G	exonic	MYH6	.	nonsynonymous SNV	MYH6:NM_002471:exon33:c.T4838C:p.V1613A,	exonic	MYH6	.	nonsynonymous SNV	MYH6:uc001wjv.3:exon33:c.T4838C:p.V1613A,	exonic	ENSG00000197616	.	nonsynonymous SNV	ENSG00000197616:ENST00000356287:exon32:c.T4838C:p.V1613A	rs61742476	rs61742476	rs61742476	0.048722	0.1604	0.0101	0.0051	0.004	0.0159	0.0019	0.0155	0.042	0.16	0.049	0.16	0.01	0.016	0.004	0.0051	0.015	0.12	0.0081	0.015	0.0005	0.0031	0.0022	0.007	0.015	0.042	0.0019
chr14	23859610	23859610	C	T	exonic	MYH6	.	nonsynonymous SNV	MYH6:NM_002471:exon26:c.G3388A:p.A1130T,	exonic	MYH6	.	nonsynonymous SNV	MYH6:uc001wjv.3:exon26:c.G3388A:p.A1130T,	exonic	ENSG00000197616	.	nonsynonymous SNV	ENSG00000197616:ENST00000356287:exon25:c.G3388A:p.A1130T	rs28730771	rs28730771	rs28730771	0.0728834	0.0098	0.121	0.0726	0.1352	0.0605	.	.	.	0.14	0.073	0.0098	0.12	0.06	0.14	0.073	0.1	0.026	0.1	0.076	0.093	0.12	0.095	0.072	.	.	.
chr14	23862177	23862177	C	G	exonic	MYH6	.	nonsynonymous SNV	MYH6:NM_002471:exon24:c.G3195C:p.Q1065H,	exonic	MYH6	.	nonsynonymous SNV	MYH6:uc001wjv.3:exon24:c.G3195C:p.Q1065H,	exonic	ENSG00000197616	.	nonsynonymous SNV	ENSG00000197616:ENST00000356287:exon23:c.G3195C:p.Q1065H	rs267606904	rs267606904	rs267606904	.	.	.	.	.	.	.	.	.	0.0022	.	.	.	.	.	.	0.0002	0	0	0.0013	0.0011	0.0001	0.0022	0.0001	.	.	.
chr14	23876267	23876267	C	T	exonic	MYH6	.	nonsynonymous SNV	MYH6:NM_002471:exon3:c.G166A:p.G56R,	exonic	MYH6	.	nonsynonymous SNV	MYH6:uc001wjv.3:exon3:c.G166A:p.G56R	exonic	ENSG00000197616	.	nonsynonymous SNV	ENSG00000197616:ENST00000356287:exon2:c.G166A:p.G56R	rs28711516	rs28711516	rs28711516	0.0567093	0.0545	0.0562	0.0869	0.0696	0.0179	0.0883	0.0802	0.0645	0.088	0.057	0.054	0.056	0.018	0.07	0.087	0.07	0.06	0.04	0.015	0.049	0.082	0.087	0.083	0.08	0.065	0.088
chr14	73673178	73673178	A	G	exonic	PSEN1	.	nonsynonymous SNV	PSEN1:NM_000021:exon9:c.A953G:p.E318G	exonic	PSEN1	.	nonsynonymous SNV	PSEN1:uc001xnr.3:exon9:c.A953G:p.E318G	exonic	ENSG00000080815	.	nonsynonymous SNV	ENSG00000080815:ENST00000406768:exon7:c.A677G:p.E226G	rs17125721	rs17125721	rs17125721	0.00559105	0.0015	0.0072	0.001	0.0199	.	0.0187	0.0138	0.0043	0.036	0.0056	0.0015	0.0072	.	0.02	0.001	0.015	0.004	0.0047	0	0.036	0.021	0.018	0.0067	0.014	0.0043	0.019
chr17	78078656	78078656	G	A	exonic	GAA	.	nonsynonymous SNV	GAA:NM_000152:exon2:c.G271A:p.D91N	exonic	GAA	.	nonsynonymous SNV	GAA:uc002jxp.3:exon2:c.G271A:p.D91N	exonic	ENSG00000171298	.	nonsynonymous SNV	ENSG00000171298:ENST00000302262:exon2:c.G271A:p.D91N	rs1800299	rs1800299	rs1800299	0.0115815	0.0053	0.0173	0.0102	0.0278	0.001	0.0315	0.0231	0.0066	0.032	0.012	0.0053	0.017	0.001	0.028	0.01	0.021	0.0064	0.0091	0.0001	0.021	0.032	0.017	0.0078	0.023	0.0066	0.032
chr17	78078805	78078805	C	A	exonic	GAA	.	nonsynonymous SNV	GAA:NM_000152:exon2:c.C420A:p.N140K	exonic	GAA	.	nonsynonymous SNV	GAA:uc002jxp.3:exon2:c.C420A:p.N140K	exonic	ENSG00000171298	.	nonsynonymous SNV	ENSG00000171298:ENST00000302262:exon2:c.C420A:p.N140K	.	.	rs560661191	0.000199681	.	.	0.001	.	.	.	.	.	0.001	0.0002	.	.	.	.	0.001	0	0	0	0	0	0	0	0	.	.	.
chr17	78085871	78085871	G	A	exonic	GAA	.	nonsynonymous SNV	GAA:NM_000152:exon12:c.G1726A:p.G576S	exonic	GAA	.	nonsynonymous SNV	GAA:uc002jxp.3:exon12:c.G1726A:p.G576S	exonic	ENSG00000171298	.	nonsynonymous SNV	ENSG00000171298:ENST00000302262:exon12:c.G1726A:p.G576S	rs1800307	rs1800307	rs1800307	0.0371406	.	0.0144	0.0286	.	0.1468	0.0005	0.0008	0.0014	0.15	0.037	.	0.014	0.15	.	0.029	0.018	0.0006	0.0092	0.14	0.012	0.0038	0.018	0.028	0.0008	0.0014	0.0005
chr17	78087041	78087041	G	A	exonic	GAA	.	nonsynonymous SNV	GAA:NM_000152:exon15:c.G2065A:p.E689K	exonic	GAA	.	nonsynonymous SNV	GAA:uc002jxp.3:exon15:c.G2065A:p.E689K	exonic	ENSG00000171298	.	nonsynonymous SNV	ENSG00000171298:ENST00000302262:exon15:c.G2065A:p.E689K	rs1800309	rs1800309	rs1800309	0.0780751	0.0091	0.0346	0.0767	0.0378	0.2401	0.0348	0.0296	0.0193	0.31	0.078	0.0091	0.035	0.24	0.038	0.077	0.088	0.03	0.046	0.31	0.13	0.068	0.084	0.081	0.03	0.019	0.035
chr18	28588385	28588385	A	C	exonic	DSC3	.	nonsynonymous SNV	DSC3:NM_001941:exon10:c.T1370G:p.L457W	exonic	DSC3	.	nonsynonymous SNV	DSC3:uc002kwi.4:exon10:c.T1370G:p.L457W	exonic	ENSG00000134762	.	nonsynonymous SNV	ENSG00000134762:ENST00000360428:exon10:c.T1370G:p.L457W	rs202208419	rs202208419	rs202208419	0.000199681	.	.	.	.	0.001	.	.	.	0.0014	0.0002	.	.	0.001	.	.	0.0002	0	0.0001	0.0014	0.0002	0.0001	0	0.0001	.	.	.
chr18	28604407	28604407	G	A	exonic	DSC3	.	nonsynonymous SNV	DSC3:NM_001941:exon6:c.C683T:p.P228L	exonic	DSC3	.	nonsynonymous SNV	DSC3:uc002kwi.4:exon6:c.C683T:p.P228L	exonic	ENSG00000134762	.	nonsynonymous SNV	ENSG00000134762:ENST00000360428:exon6:c.C683T:p.P228L	rs116469001	rs116469001	rs116469001	0.000399361	.	.	.	.	0.002	.	.	.	0.002	0.0004	.	.	0.002	.	.	0.0001	0	0	0.0013	0	0	0	0	.	.	.
chr18	29104714	29104714	A	G	exonic	DSG2	.	nonsynonymous SNV	DSG2:NM_001943:exon8:c.A877G:p.I293V,	exonic	DSG2	.	nonsynonymous SNV	DSG2:uc002kwu.4:exon8:c.A877G:p.I293V,	exonic	ENSG00000046604	.	nonsynonymous SNV	ENSG00000046604:ENST00000261590:exon8:c.A877G:p.I293V,	rs2230234	rs2230234	rs2230234	0.0323482	0.003	0.036	0.0368	0.0954	0.001	0.0859	0.0636	0.0143	0.14	0.032	0.003	0.036	0.001	0.095	0.037	0.069	0.015	0.041	0.0002	0.14	0.089	0.089	0.043	0.064	0.014	0.086
chr18	29122618	29122618	G	A	exonic	DSG2	.	nonsynonymous SNV	DSG2:NM_001943:exon14:c.G2137A:p.E713K,	exonic	DSG2	.	nonsynonymous SNV	DSG2:uc002kwu.4:exon14:c.G2137A:p.E713K,	exonic	ENSG00000046604	.	nonsynonymous SNV	ENSG00000046604:ENST00000261590:exon14:c.G2137A:p.E713K,	rs79241126	rs79241126	rs79241126	0.0259585	0.0015	0.0432	0.0092	0.0885	.	0.0777	0.0584	0.018	0.095	0.026	0.0015	0.043	.	0.088	0.0092	0.052	0.013	0.026	0.0001	0.095	0.074	0.056	0.013	0.058	0.018	0.078
chr2	179392277	179392277	A	G	exonic	TTN	.	nonsynonymous SNV	TTN:NM_003319:exon190:c.T80381C:p.M26794T	exonic	TTN	.	nonsynonymous SNV	TTN:uc021vtb.2:exon190:c.T80381C:p.M26794T	exonic	ENSG00000155657	.	nonsynonymous SNV	ENSG00000155657:ENST00000460472:exon190:c.T80381C:p.M26794T	rs72629793	rs72629793	rs72629793	0.00219649	.	.	0.0102	0.001	.	0.0016	0.0011	.	0.01	0.0022	.	.	.	0.001	0.01	0.0022	0.0002	0.0003	0	0.0002	0.0016	0.0044	0.0093	0.0011	.	0.0016
chr2	179393398	179393398	G	C	exonic	TTN	.	nonsynonymous SNV	TTN:NM_003319:exon188:c.C79885G:p.L26629V	exonic	TTN	.	nonsynonymous SNV	TTN:uc002umq.4:exon1:c.C427G:p.L143V	exonic	ENSG00000155657	.	nonsynonymous SNV	ENSG00000155657:ENST00000460472:exon188:c.C79885G:p.L26629V	.	.	rs769369764	.	.	.	.	.	.	.	.	.	0.001	.	.	.	.	.	.	0.0001	0	0	0.001	0	0	0	0	.	.	.
chr2	179558721	179558721	T	C	exonic	TTN	.	nonsynonymous SNV	TTN:NM_133378:exon115:c.A27709G:p.T9237A	exonic	TTN	.	nonsynonymous SNV	TTN:uc010fre.1:exon12:c.A1042G:p.T348A	exonic	ENSG00000155657	.	nonsynonymous SNV	ENSG00000155657:ENST00000414766:exon12:c.A1075G:p.T359A	rs370208651	rs370208651	rs370208651	.	.	.	.	.	.	.	.	.	0.0011	.	.	.	.	.	.	0.0001	0	0	0.0011	0	0.0001	0	0.0002	.	.	.
chr2	179569245	179569245	G	A	exonic	TTN	.	nonsynonymous SNV	TTN:NM_133378:exon102:c.C26222T:p.T8741I	exonic	TTN	.	nonsynonymous SNV	TTN:uc002umz.1:exon60:c.C16205T:p.T5402I	exonic	ENSG00000155657	.	nonsynonymous SNV	ENSG00000155657:ENST00000342992:exon102:c.C26222T:p.T8741I	.	.	.	.	.	.	.	.	.	.	.	.	.	.	.	.	.	.	.	.	.	.	.	.	.	.	.	.	.	.
chr2	179569368	179569368	C	G	exonic	TTN	.	nonsynonymous SNV	TTN:NM_133378:exon102:c.G26099C:p.S8700T	exonic	TTN	.	nonsynonymous SNV	TTN:uc002umz.1:exon60:c.G16082C:p.S5361T	exonic	ENSG00000155657	.	nonsynonymous SNV	ENSG00000155657:ENST00000342992:exon102:c.G26099C:p.S8700T	.	.	rs766917273	.	.	.	.	.	.	.	.	.	0	.	.	.	.	.	.	0	0	0	0	0	0	0	0	.	.	.
chr2	179592318	179592318	C	A	exonic	TTN	.	nonsynonymous SNV	TTN:NM_133378:exon65:c.G16255T:p.V5419L	exonic	TTN	.	nonsynonymous SNV	TTN:uc002umz.1:exon23:c.G6238T:p.V2080L	exonic	ENSG00000155657	.	nonsynonymous SNV	ENSG00000155657:ENST00000342992:exon65:c.G16255T:p.V5419L	.	.	.	.	.	.	.	.	.	.	.	.	.	.	.	.	.	.	.	.	.	.	.	.	.	.	.	.	.	.
chr2	179605856	179605856	A	G	exonic	TTN	.	nonsynonymous SNV	TTN:NM_003319:exon45:c.T11015C:p.M3672T	exonic	TTN	.	nonsynonymous SNV	TTN:uc021vtb.2:exon45:c.T11015C:p.M3672T	exonic	ENSG00000155657	.	nonsynonymous SNV	ENSG00000155657:ENST00000460472:exon45:c.T11015C:p.M3672T	.	.	.	.	.	.	.	.	.	.	.	.	.	.	.	.	.	.	.	.	.	.	.	.	.	.	.	.	.	.
chr2	179659191	179659191	C	T	exonic	TTN	.	nonsynonymous SNV	TTN:NM_001256850:exon8:c.G1333A:p.A445T	exonic	TTN	.	nonsynonymous SNV	TTN:uc010frg.1:exon2:c.G355A:p.A119T	exonic	ENSG00000155657	.	nonsynonymous SNV	ENSG00000155657:ENST00000436599:exon2:c.G121A:p.A41T	rs142414432	rs142414432	rs142414432	0.000399361	.	0.0014	.	.	0.001	0.0006	0.0004	.	0.0014	0.0004	.	0.0014	0.001	.	.	0.0002	0	0.0007	0.0001	0	0.0003	0	0.0001	0.0004	.	0.0006
chr21	35821680	35821680	C	T	exonic	KCNE1;KCNE1B	.	nonsynonymous SNV	KCNE1:NM_001127670:exon2:c.G253A:p.D85N	exonic	KCNE1	.	nonsynonymous SNV	KCNE1:uc021wit.1:exon1:c.G253A:p.D85N	exonic	ENSG00000180509	.	nonsynonymous SNV	ENSG00000180509:ENST00000416357:exon2:c.G253A:p.D85N	rs1805128	rs1805128	rs1805128	0.00379393	0.0015	0.0029	0.001	0.0089	0.005	0.0122	0.0088	0.002	0.017	0.0038	0.0015	0.0029	0.005	0.0089	0.001	0.0092	0.0018	0.0019	0.0056	0.017	0.013	0.0077	0.0014	0.0088	0.002	0.012
chr3	14176344	14176344	C	T	exonic	TMEM43	.	nonsynonymous SNV	TMEM43:NM_024334:exon8:c.C658T:p.R220C,	exonic	TMEM43	.	nonsynonymous SNV	TMEM43:uc003byl.1:exon6:c.C298T:p.R100C	exonic	ENSG00000170876	.	nonsynonymous SNV	ENSG00000170876:ENST00000306077:exon8:c.C658T:p.R220C,	.	.	rs562700595	.	.	.	.	.	.	.	.	.	0.0002	.	.	.	.	.	.	0	0	0	0.0001	0	0	0	0.0002	.	.	.
chr3	14180731	14180731	C	T	exonic	TMEM43	.	nonsynonymous SNV	TMEM43:NM_024334:exon11:c.C934T:p.R312W,	exonic	TMEM43	.	nonsynonymous SNV	TMEM43:uc003byk.2:exon11:c.C934T:p.R312W,	exonic	ENSG00000170876;ENSG00000268279	.	nonsynonymous SNV	ENSG00000170876:ENST00000306077:exon11:c.C934T:p.R312W,	rs113449357	rs113449357	rs113449357	0.00379393	.	0.0115	0.001	0.0099	.	0.0134	0.0098	0.003	0.035	0.0038	.	0.011	.	0.0099	0.001	0.009	0.0021	0.003	0	0.035	0.011	0.014	0.0023	0.0098	0.003	0.013
chr4	52890281	52890281	G	A	exonic	SGCB	.	nonsynonymous SNV	SGCB:NM_000232:exon6:c.C799T:p.R267C,	exonic	SGCB	.	nonsynonymous SNV	SGCB:uc011bzp.1:exon5:c.C589T:p.R197C	exonic	ENSG00000163069	.	nonsynonymous SNV	ENSG00000163069:ENST00000535450:exon5:c.C589T:p.R197C	rs200761715	rs200761715	rs200761715	0.00439297	.	0.0014	0.0215	.	.	0.0001	7.7e-05	.	0.021	0.0044	.	0.0014	.	.	0.021	0.0022	0	0.0005	0	0	0.0002	0	0.015	0.0001	.	0.0001
chr6	7542236	7542236	G	A	exonic	DSP	.	nonsynonymous SNV	DSP:NM_001008844:exon1:c.G88A:p.V30M	exonic	DSP	.	nonsynonymous SNV	DSP:uc003mxp.1:exon1:c.G88A:p.V30M	exonic	ENSG00000096696	.	nonsynonymous SNV	ENSG00000096696:ENST00000379802:exon1:c.G88A:p.V30M	rs121912998	rs121912998	rs121912998	0.00219649	.	0.0014	0.0082	0.001	0.001	0.0019	0.0012	.	0.011	0.0022	.	0.0014	0.001	0.001	0.0082	0.0031	0.0005	0.001	0	0.0008	0.0033	0.0056	0.0057	0.0012	.	0.0019
chr6	7581485	7581485	G	A	exonic	DSP	.	nonsynonymous SNV	DSP:NM_004415:exon23:c.G5062A:p.A1688T,	exonic	DSP	.	nonsynonymous SNV	DSP:uc003mxp.1:exon23:c.G5062A:p.A1688T,	exonic	ENSG00000096696	.	nonsynonymous SNV	ENSG00000096696:ENST00000379802:exon23:c.G5062A:p.A1688T,	.	.	rs757753880	.	.	.	.	.	.	.	.	.	0.0001	.	.	.	.	.	.	0.0001	0	0	0	0	0.0001	0	0	.	.	.
chr6	112493889	112493889	A	T	exonic	LAMA4	.	nonsynonymous SNV	LAMA4:NM_001105206:exon12:c.T1475A:p.L492H	exonic	LAMA4	.	nonsynonymous SNV	LAMA4:uc003pvt.3:exon12:c.T1454A:p.L485H	exonic	ENSG00000112769	.	nonsynonymous SNV	ENSG00000112769:ENST00000424408:exon11:c.T1454A:p.L485H	rs3752579	rs3752579	rs3752579	0.00259585	.	0.0043	.	.	0.0099	.	.	.	0.016	0.0026	.	0.0043	0.0099	.	.	0.0028	0.0001	0.016	0.016	0	0.0001	0.0011	0.0002	.	.	.
chr6	112496611	112496611	C	T	exonic	LAMA4	.	nonsynonymous SNV	LAMA4:NM_001105206:exon11:c.G1261A:p.V421M	exonic	LAMA4	.	nonsynonymous SNV	LAMA4:uc003pvt.3:exon11:c.G1240A:p.V414M	exonic	ENSG00000112769	.	nonsynonymous SNV	ENSG00000112769:ENST00000424408:exon10:c.G1240A:p.V414M	.	.	.	.	.	.	.	.	.	.	.	.	.	.	.	.	.	.	.	.	.	.	.	.	.	.	.	.	.	.
chr6	112508755	112508755	G	C	exonic	LAMA4	.	nonsynonymous SNV	LAMA4:NM_001105206:exon8:c.C863G:p.A288G	exonic	LAMA4	.	nonsynonymous SNV	LAMA4:uc003pvt.3:exon8:c.C842G:p.A281G	exonic	ENSG00000112769	.	nonsynonymous SNV	ENSG00000112769:ENST00000424408:exon7:c.C842G:p.A281G	rs150084275	rs150084275	rs150084275	0.000399361	.	.	0.002	.	.	0.0003	0.0003	0.0002	0.002	0.0004	.	.	.	.	0.002	0.0006	0.0002	0.0003	0.0001	0.0003	0.0007	0	0.0015	0.0003	0.0002	0.0003
chr6	129588259	129588259	G	T	exonic	LAMA2	.	nonsynonymous SNV	LAMA2:NM_000426:exon16:c.G2217T:p.W739C	exonic	LAMA2	.	nonsynonymous SNV	LAMA2:uc003qbn.3:exon16:c.G2217T:p.W739C	exonic	ENSG00000196569	.	nonsynonymous SNV	ENSG00000196569:ENST00000421865:exon16:c.G2217T:p.W739C,	rs192317605	rs192317605	rs192317605	0.00159744	.	.	0.002	.	0.006	.	.	.	0.011	0.0016	.	.	0.006	.	0.002	0.0009	0	0	0.011	0	0.0002	0	0.0005	.	.	.
chr6	129591838	129591838	A	G	exonic	LAMA2	.	nonsynonymous SNV	LAMA2:NM_000426:exon17:c.A2392G:p.K798E	exonic	LAMA2	.	nonsynonymous SNV	LAMA2:uc003qbn.3:exon17:c.A2392G:p.K798E	exonic	ENSG00000196569	.	nonsynonymous SNV	ENSG00000196569:ENST00000421865:exon17:c.A2392G:p.K798E,	.	.	rs755581747	.	.	.	.	.	.	.	.	.	0	.	.	.	.	.	.	0	0	0	0	0	0	0	0	.	.	.
chr6	129635800	129635800	G	A	exonic	LAMA2	.	nonsynonymous SNV	LAMA2:NM_000426:exon24:c.G3412A:p.V1138M	exonic	LAMA2	.	nonsynonymous SNV	LAMA2:uc003qbn.3:exon24:c.G3412A:p.V1138M	exonic	ENSG00000196569	.	nonsynonymous SNV	ENSG00000196569:ENST00000421865:exon24:c.G3412A:p.V1138M,	rs2306942	rs2306942	rs2306942	0.120008	0.2186	0.0562	0.1207	0.0427	0.1111	0.0469	0.0911	0.1775	0.22	0.12	0.22	0.056	0.11	0.043	0.12	0.069	0.19	0.05	0.15	0.031	0.042	0.067	0.087	0.091	0.18	0.047
chr6	129670493	129670493	C	T	exonic	LAMA2	.	nonsynonymous SNV	LAMA2:NM_000426:exon31:c.C4487T:p.A1496V	exonic	LAMA2	.	nonsynonymous SNV	LAMA2:uc003qbn.3:exon31:c.C4487T:p.A1496V	exonic	ENSG00000196569	.	nonsynonymous SNV	ENSG00000196569:ENST00000421865:exon31:c.C4487T:p.A1496V,	rs147077184	rs147077184	rs147077184	0.00279553	.	0.0086	.	0.008	.	0.0044	0.003	0.0002	0.011	0.0028	.	0.0086	.	0.008	.	0.0033	0.0004	0.0021	0	0.0042	0.0051	0.0044	0.0002	0.003	0.0002	0.0044
chr6	129687396	129687396	G	A	exonic	LAMA2	.	nonsynonymous SNV	LAMA2:NM_000426:exon33:c.G4750A:p.G1584S	exonic	LAMA2	.	nonsynonymous SNV	LAMA2:uc003qbn.3:exon33:c.G4750A:p.G1584S	exonic	ENSG00000196569	.	nonsynonymous SNV	ENSG00000196569:ENST00000421865:exon33:c.G4750A:p.G1584S,	rs117781224	rs117781224	rs117781224	0.0101837	0.0023	0.0173	0.0041	0.0318	.	0.033	0.0247	0.0084	0.033	0.01	0.0023	0.017	.	0.032	0.0041	0.02	0.0066	0.0095	0	0.012	0.029	0.011	0.011	0.025	0.0084	0.033
chr6	129722453	129722453	C	A	exonic	LAMA2	.	nonsynonymous SNV	LAMA2:NM_000426:exon38:c.C5530A:p.R1844S	exonic	LAMA2	.	nonsynonymous SNV	LAMA2:uc003qbn.3:exon38:c.C5530A:p.R1844S	exonic	ENSG00000196569	.	nonsynonymous SNV	ENSG00000196569:ENST00000421865:exon38:c.C5530A:p.R1844S,	rs56173620	rs56173620	rs56173620	0.00499201	.	0.0043	0.002	0.0199	.	0.0171	0.0127	0.0041	0.022	0.005	.	0.0043	.	0.02	0.002	0.011	0.0029	0.0045	0	0.0053	0.017	0.0044	0.0024	0.013	0.0041	0.017
chr6	133595949	133595949	T	G	exonic	EYA4	.	nonsynonymous SNV	EYA4:NM_001301012:exon2:c.T31G:p.S11A	exonic	EYA4	.	nonsynonymous SNV	EYA4:uc003qec.4:exon2:c.T31G:p.S11A	exonic	ENSG00000112319	.	nonsynonymous SNV	ENSG00000112319:ENST00000431403:exon1:c.T31G:p.S11A	.	.	.	.	.	.	.	.	.	.	.	.	.	.	.	.	.	.	.	.	.	.	.	.	.	.	.	.	.	.
chr7	35289756	35289756	C	T	exonic	TBX20	.	nonsynonymous SNV	TBX20:NM_001077653:exon2:c.G187A:p.A63T	exonic	TBX20	.	nonsynonymous SNV	TBX20:uc011kas.2:exon2:c.G187A:p.A63T,	exonic	ENSG00000164532	.	nonsynonymous SNV	ENSG00000164532:ENST00000408931:exon2:c.G187A:p.A63T,	rs201839825	rs201839825	rs201839825	0.000399361	.	.	.	0.002	.	0.0001	7.7e-05	.	0.0073	0.0004	.	.	.	0.002	.	0.0007	0	0.0001	0.0014	0.0073	0.0004	0	0.0001	0.0001	.	0.0001
chr7	91726907	91726907	C	T	exonic	AKAP9	.	nonsynonymous SNV	AKAP9:NM_005751:exon42:c.C10406T:p.T3469M	exonic	AKAP9	.	nonsynonymous SNV	AKAP9:uc003ull.3:exon4:c.C1094T:p.T365M	exonic	ENSG00000127914	.	nonsynonymous SNV	ENSG00000127914:ENST00000394534:exon16:c.C3944T:p.T1315M	.	.	rs746860114	.	.	.	.	.	.	.	.	.	0.0032	.	.	.	.	.	.	0.0003	0	0	0.0032	0	0	0	0.0001	.	.	.
chr7	151478406	151478406	C	T	exonic	PRKAG2	.	nonsynonymous SNV	PRKAG2:NM_001040633:exon3:c.G166A:p.G56S	exonic	PRKAG2	.	nonsynonymous SNV	PRKAG2:uc003wkj.3:exon3:c.G166A:p.G56S	exonic	ENSG00000106617	.	nonsynonymous SNV	ENSG00000106617:ENST00000287878:exon3:c.G298A:p.G100S	rs79474211	rs79474211	rs79474211	0.0145767	.	.	0.0378	0.001	0.0347	0.0008	0.0008	0.0009	0.043	0.015	.	.	0.035	0.001	0.038	0.0081	0.0006	0.001	0.035	0	0.0008	0.01	0.036	0.0008	0.0009	0.0008
chr9	108366499	108366499	G	A	exonic	FKTN	.	nonsynonymous SNV	FKTN:NM_001351498:exon5:c.G373A:p.G125S	exonic	FKTN	.	nonsynonymous SNV	FKTN:uc004bcs.3:exon5:c.G373A:p.G125S	exonic	ENSG00000106692	.	nonsynonymous SNV	ENSG00000106692:ENST00000357998:exon4:c.G373A:p.G125S	rs34006675	rs34006675	rs34006675	0.0371406	0.1263	0.013	0.002	0.008	.	0.0114	0.0369	0.0867	0.13	0.037	0.13	0.013	.	0.008	0.002	0.015	0.092	0.0087	0	0.006	0.011	0.011	0.0028	0.037	0.087	0.011
chrX	31496431	31496431	T	A	exonic	DMD	.	nonsynonymous SNV	DMD:NM_004014:exon5:c.A542T:p.E181V	exonic	DMD	.	nonsynonymous SNV	DMD:uc004dcq.1:exon5:c.A542T:p.E181V	exonic	ENSG00000198947	.	nonsynonymous SNV	ENSG00000198947:ENST00000358062:exon12:c.A1817T:p.E606V	rs41305353	rs41305353	rs41305353	0.0357616	0.0778	0.0267	0.0028	0.0131	0.0406	0.0085	0.0303	0.0686	0.073	0.036	0.059	0.02	0.031	0.0099	0.002	0.022	0.073	0.026	0.046	0.014	0.012	0.0079	0.012	0.03	0.069	0.0085
chrX	32381067	32381067	C	G	exonic	DMD	.	nonsynonymous SNV	DMD:NM_004011:exon9:c.G1140C:p.K380N	exonic	DMD	.	nonsynonymous SNV	DMD:uc004dcw.2:exon9:c.G1131C:p.K377N	exonic	ENSG00000198947	.	nonsynonymous SNV	ENSG00000198947:ENST00000357033:exon37:c.G5163C:p.K1721N	rs72468630	rs72468630	rs72468630	0.0010596	.	.	.	.	0.0052	.	.	.	0.014	0.0011	.	.	0.004	.	.	0.0012	0	0	0.014	0	0	0	0.0012	.	.	.
chr11	19213986	19213986	A	G	exonic	CSRP3	.	nonsynonymous SNV	CSRP3:NM_003476:exon3:c.T10C:p.W4R,	exonic	CSRP3	.	nonsynonymous SNV	CSRP3:uc001mpk.3:exon3:c.T10C:p.W4R,	exonic	ENSG00000129170	.	nonsynonymous SNV	ENSG00000129170:ENST00000265968:exon2:c.T10C:p.W4R	rs45550635	rs45550635	rs45550635	0.00179712	0.0015	0.0014	0.001	0.005	.	0.0054	0.0037	0.0005	0.0054	0.0018	0.0015	0.0014	.	0.005	0.001	0.0024	0.0007	0.0003	0	0.0009	0.0039	0.0022	0.0007	0.0037	0.0005	0.0054
[truncated: 372 more columns]
